# Supplementary material for: Transcriptomic, metabolomic, and ATAC-seq analysis reveal the regulatory mechanism of senescence of post-harvest tomato fruit
Source: Front Plant Sci. 2023 Mar 8;14:1142913. doi: 10.3389/fpls.2023.1142913 (PMC10032333; doi:10.3389/fpls.2023.1142913)
Supplement: Supplementary file 3 [file Table_2.xlsx]

## Sheet: Appendix.5DAMs of J14 vs Y14
#ID	name	HSV1S2-1	HSV1S2-2	HSV1S2-3	HSV2S2-1	HSV2S2-2	HSV2S2-3	HSV1S2_Mean	HSV2S2_Mean	Fold_change	log2FC	Pvalue	VIP	regulated	HMDB_taxonomy	KEGG_annotation	KEGG_pathway_annotation	HMDB_ID	pubchem_id	CAS	HMDB_super_class	HMDB_sub_class
meta_30	Indole	332710	339540	295570	400580	370560	357090	322607	376077	1.16574	0.221251	0.0465716	1.76548	up	Indoles and derivatives	C00463	Biosynthesis of secondary metabolites(ko01110);;Metabolic pathways(ko01100);;Tryptophan metabolism(ko00380);;Benzoxazinoid biosynthesis(ko00402);;Phenylalanine, tyrosine and tryptophan biosynthesis(ko00400)	HMDB0000738	798	120-72-9	Organoheterocyclic compounds	Indoles
meta_32	L-Valine	1522400	1944600	1838600	3066600	2575800	2262900	1.76853e+06	2635100	1.48999	0.575304	0.0454448	1.83774	up	Carboxylic acids and derivatives	C00183	ABC transporters(ko02010);;Glucosinolate biosynthesis(ko00966);;Biosynthesis of amino acids(ko01230);;Valine, leucine and isoleucine degradation(ko00280);;Biosynthesis of secondary metabolites(ko01110);;Pantothenate and CoA biosynthesis(ko00770);;Valine, leucine and isoleucine biosynthesis(ko00290);;Aminoacyl-tRNA biosynthesis(ko00970);;2-Oxocarboxylic acid metabolism(ko01210);;Metabolic pathways…	HMDB0000883	6287	72-18-4	Organic acids and derivatives	Amino acids, peptides, and analogues
meta_65	Trans-4-Hydroxy-L-proline	41271000	46279000	42970000	65568000	55725000	53862000	4.35067e+07	58385000	1.34198	0.424361	0.0399845	1.90795	up	Carboxylic acids and derivatives	C01157	ABC transporters(ko02010);;Metabolic pathways(ko01100);;Arginine and proline metabolism(ko00330)	HMDB0000725	5810	51-35-4	Organic acids and derivatives	Amino acids, peptides, and analogues
meta_69	L-Isoleucine*	2378000	2325100	1973800	2879300	2756800	2694600	2.22563e+06	2776900	1.24769	0.319259	0.033882	1.92852	up	--	--	--	--	--	--	--	--
meta_71	6-Aminocaproic acid	790030	911560	892010	1378900	1187000	1105300	864533	1.22373e+06	1.41548	0.501296	0.0309613	1.93045	up	Fatty Acyls	C02378	Metabolic pathways(ko01100)	HMDB0001901	564	60-32-2	Lipids and lipid-like molecules	Fatty acids and conjugates
meta_72	6-Deoxyfagomine	9978200	11145000	10293000	14478000	12262000	13009000	1.04721e+07	1.32497e+07	1.26524	0.33941	0.031749	1.90369	up	--	--	--	--	--	--	--	--
meta_119	L-Lysine	70223	89418	93051	141960	137040	120930	84230.7	133310	1.58268	0.662368	0.00691635	2.01078	up	Carboxylic acids and derivatives	C00047	Aminoacyl-tRNA biosynthesis(ko00970);;Lysine degradation(ko00310);;Tropane, piperidine and pyridine alkaloid biosynthesis(ko00960);;Biotin metabolism(ko00780);;Biosynthesis of amino acids(ko01230);;Biosynthesis of secondary metabolites(ko01110);;Lysine biosynthesis(ko00300);;ABC transporters(ko02010);;Metabolic pathways(ko01100);;2-Oxocarboxylic acid metabolism(ko01210)	HMDB0000182	5962	56-87-1	Organic acids and derivatives	Amino acids, peptides, and analogues
meta_152	Arecoline	598650	688940	668730	775670	735100	766040	652107	758937	1.16382	0.218872	0.0428351	1.88021	up	--	--	--	--	--	--	--	--
meta_195	2-Amino-3-methoxybenzoic acid	76996	73334	82700	66552	49902	59032	77676.7	58495.3	0.753062	-0.40916	0.0372285	1.86846	down	--	--	--	--	--	--	--	--
meta_255	3-amino-2-naphthoic acid	31466000	28585000	30843000	34249000	34318000	33475000	30298000	34014000	1.12265	0.166906	0.0413353	1.9343	up	--	--	--	--	--	--	--	--
meta_292	L-Tryptophan	31622000	30484000	29412000	33634000	32281000	32403000	30506000	3.27727e+07	1.0743	0.1034	0.0496658	1.78324	up	Indoles and derivatives	C00078	Aminoacyl-tRNA biosynthesis(ko00970);;Biosynthesis of various secondary metabolites - part 2(ko00998);;Glucosinolate biosynthesis(ko00966);;Biosynthesis of secondary metabolites(ko01110);;Biosynthesis of amino acids(ko01230);;Phenylalanine, tyrosine and tryptophan biosynthesis(ko00400);;Glycine, serine and threonine metabolism(ko00260);;Tryptophan metabolism(ko00380);;Indole alkaloid biosynthesis…	HMDB0000929	6305	73-22-3	Organoheterocyclic compounds	Indolyl carboxylic acids and derivatives
meta_307	12-Oxo-10E-Dodecenoic Acid	2869.5	2792.5	2533.4	3104.2	3142	3284.3	2731.8	3176.83	1.16291	0.217738	0.0295867	1.91377	up	Fatty Acyls	C16309	alpha-Linolenic acid metabolism(ko00592);;Biosynthesis of secondary metabolites(ko01110)	HMDB0037326	5312889	65410-38-0	Lipids and lipid-like molecules	Fatty acids and conjugates
meta_350	Tridecanedioic acid	983880	1022700	1005200	953400	932560	966180	1.00393e+06	950713	0.946995	-0.0785716	0.024061	1.88205	down	Fatty Acyls	--	--	HMDB0002327	10458	505-52-2	Lipids and lipid-like molecules	Fatty acids and conjugates
meta_394	Naringenin (5,7,4'-Trihydroxyflavanone)	14949	18341	13721	8284.1	6116.3	9066	15670.3	7822.13	0.499168	-1.0024	0.0129633	1.99002	down	--	--	--	--	--	--	--	--
meta_430	Genkwanin (Apigenin 7-methyl ether)	15651	9	9	29290	35266	35070	5223	33208.7	6.35816	2.66861	0.0220967	2.00357	up	--	--	--	--	--	--	--	--
meta_432	Prunetin (5,4'-Dihydroxy-7-methoxyisoflavone)	10568	9	9	34010	36711	33981	3528.67	34900.7	9.89061	3.30606	0.00889729	2.10086	up	--	--	--	--	--	--	--	--
meta_450	12-Oxo-phytodienoic acid	4031.9	4093.7	3889.5	4987.1	4933.9	4884.5	4005.03	4935.17	1.23224	0.301285	0.000963206	2.13419	up	--	--	--	--	--	--	--	--
meta_475	Ricinoleic acid	27284	26326	25003	31279	29320	31537	26204.3	30712	1.17202	0.228997	0.00951324	1.98259	up	Fatty Acyls	--	--	HMDB0034297	5282942	141-22-0	Lipids and lipid-like molecules	Fatty acids and conjugates
meta_513	纬-Glutamyltyrosine	42472	30575	23463	58539	53193	74770	32170	62167.3	1.93246	0.950441	0.025545	1.87371	up	Carboxylic acids and derivatives	--	--	HMDB0011741	94340	7432-23-7	Organic acids and derivatives	Amino acids, peptides, and analogues
meta_583	尾-Nicotinamide mononucleotide	95154	86072	85692	148150	130110	161270	88972.7	146510	1.64669	0.719565	0.015734	2.04613	up	Pyridine nucleotides	C00455	Metabolic pathways(ko01100);;Nicotinate and nicotinamide metabolism(ko00760)	HMDB0000229	14181	75414-16-3	Nucleosides, nucleotides, and analogues	Nicotinamide nucleotides
meta_601	D-Sucrose	494970	394860	414410	323820	357820	258830	434747	313490	0.721087	-0.471756	0.0455044	1.76896	down	Organooxygen compounds	C00089	Biosynthesis of secondary metabolites(ko01110);;Metabolic pathways(ko01100);;ABC transporters(ko02010);;Starch and sucrose metabolism(ko00500);;Galactose metabolism(ko00052)	HMDB0000258	5988	57-50-1	Organic oxygen compounds	Carbohydrates and carbohydrate conjugates
meta_637	glucoacetosyringone	23065	24956	20439	30300	29695	26964	22820	28986.3	1.27022	0.345074	0.0228611	1.89812	up	--	--	--	--	--	--	--	--
meta_655	Loganic acid	18265	29060	21138	33935	38380	47756	22821	40023.7	1.75381	0.810491	0.0320002	1.84519	up	--	C01512	Monoterpenoid biosynthesis(ko00902);;Biosynthesis of secondary metabolites(ko01110)	--	--	--	--	--
meta_688	Apigenin-7-O-glucoside(Cosmosiin)	37184	44885	37094	23867	15199	20392	39721	19819.3	0.498964	-1.00299	0.005277	2.02754	down	--	--	--	--	--	--	--	--
meta_701	Dunalianoside A	971960	978290	1112700	666430	618380	702220	1.02098e+06	662343	0.648731	-0.624308	0.00596662	2.07157	down	--	--	--	--	--	--	--	--
meta_767	6-Hydroxykaempferol-7-O-glucoside	674290	666310	502630	321660	440420	264240	614410	342107	0.556805	-0.844755	0.0236119	1.88049	down	--	--	--	--	--	--	--	--
meta_793	LysoPE 18:1	238870	241620	235900	155110	138110	170090	238797	154437	0.646729	-0.628767	0.00997656	2.10525	down	--	--	--	--	--	--	--	--
meta_825	Raffinose	19337	22578	24990	15933	10005	13694	22301.7	13210.7	0.592362	-0.755448	0.0189075	1.91068	down	Organooxygen compounds	C00492	Galactose metabolism(ko00052);;Metabolic pathways(ko01100);;ABC transporters(ko02010)	HMDB0003213	439242	512-69-6	Organic oxygen compounds	Carbohydrates and carbohydrate conjugates
meta_888	Naringenin-7-O-Neohesperidoside(Naringin)*	66269	64834	51840	28501	31597	30751	60981	30283	0.496597	-1.00985	0.0183871	2.06243	down	--	--	--	--	--	--	--	--
meta_940	Quercetin-3,7-Di-O-glucoside	33298	41546	27179	10278	14309	20694	34007.7	15093.7	0.443831	-1.17192	0.0249465	1.89393	down	--	--	--	--	--	--	--	--
meta_988	Kaempferol-6,8-di-C-glucoside-7-O-glucoside	322580	350300	275700	269920	229980	203660	316193	234520	0.741698	-0.431096	0.0491542	1.75644	down	--	--	--	--	--	--	--	--
meta_995	Quercetin-3-O-(6''-feruloyl)glucoside-7-O-rutinoside	183740	143650	120120	86987	56705	62032	149170	68574.7	0.459708	-1.12121	0.0313053	1.91642	down	--	--	--	--	--	--	--	--
meta_996	Luteolin-7-O-(2'''-O-rhamnosyl)sophoroside-5-O-glucoside	126100	129230	102620	89751	63817	35263	119317	62943.7	0.527535	-0.922662	0.0496245	1.82178	down	--	--	--	--	--	--	--	--
meta_998	Dehydrocommersonine	71880	92036	98806	134870	180480	131390	87574	148913	1.70043	0.765898	0.0412879	1.86664	up	--	--	--	--	--	--	--	--
