# Supplementary material for: Transcriptomic, metabolomic, and ATAC-seq analysis reveal the regulatory mechanism of senescence of post-harvest tomato fruit
Source: Front Plant Sci. 2023 Mar 8;14:1142913. doi: 10.3389/fpls.2023.1142913 (PMC10032333; doi:10.3389/fpls.2023.1142913)
Supplement: Supplementary file 6 [file Table_5.xlsx]

## Sheet: Appendix.2 DEGs of J14 vs Y14
#ID	HSV1S2-1_Count	HSV1S2-2_Count	HSV1S2-3_Count	HSV2S2-1_Count	HSV2S2-2_Count	HSV2S2-3_Count	HSV1S2-1_FPKM	HSV1S2-2_FPKM	HSV1S2-3_FPKM	HSV2S2-1_FPKM	HSV2S2-2_FPKM	HSV2S2-3_FPKM	FDR	log2FC	regulated	COG_class	COG_class_annotation	GO_annotation	KEGG_annotation	KEGG_pathway_annotation	KOG_class	KOG_class_annotation	Pfam_annotation	Swiss-Prot_annotation	eggNOG_class	eggNOG_class_annotation	NR_annotation
Solyc02g069310.3	5329	6075	8639	4538	3476	2461	56.4562	57.3358	81.728	41.9628	35.4943	23.7778	0.0352871	-0.771323	down	--	--	Cellular Component: nucleus (GO:0005634);; Biological Process: defense response to bacterium (GO:0042742);; Biological Process: defense response to fungus (GO:0050832);; Biological Process: regulation of jasmonic acid mediated signaling pathway (GO:2000022);;	K14508|0.0e+00|sly:543940|K14508 regulatory protein NPR1 | (RefSeq) NML1; NIM1-like protein 1	Plant hormone signal transduction (ko04075)	[R]	General function prediction only	NPR1/NIM1 like defence protein C terminal	BTB/POZ domain and ankyrin repeat-containing protein NPR1 OS=Malus hupehensis OX=106556 GN=NPR1 PE=2 SV=2	S	Function unknown	NIM1-like protein 1 [Solanum lycopersicum]
Solyc04g080540.2	57286	46145	37072	81708	81419	109217	1967.41	1411.69	1136.82	2449.09	2695.26	3421.12	0.0092783	0.757556	up	--	--	Biological Process: anaerobic respiration (GO:0009061);;	--	--	--	--	--	--	--	--	uncharacterized protein LOC101245159 [Solanum lycopersicum]
Solyc01g079600.4	3439	3499	4565	2381	1163	816	37.3145	33.8198	44.2319	22.5458	12.1576	8.07526	0.0107739	-0.987453	down	--	--	Biological Process: lipid metabolic process (GO:0006629);; Molecular Function: phosphatidylcholine 1-acylhydrolase activity (GO:0008970);; Cellular Component: integral component of membrane (GO:0016021);;	--	--	--	--	Lipase (class 3)	Phospholipase A1 PLIP2, chloroplastic OS=Arabidopsis thaliana OX=3702 GN=PLIP2 PE=1 SV=1	I	Lipid transport and metabolism	phospholipase A1 PLIP2, chloroplastic isoform X1 [Solanum lycopersicum]
Solyc10g080610.1	5438	5255	6756	8853	14213	9959	151.021	129.988	167.524	214.583	380.473	252.261	0.0367339	0.715078	up	[M]	Cell wall/membrane/envelope biogenesis	Cellular Component: ubiquitin ligase complex (GO:0000151);; Molecular Function: molecular_function (GO:0003674);; Molecular Function: binding (GO:0005488);; Molecular Function: protein binding (GO:0005515);; Cellular Component: cellular_component (GO:0005575);; Cellular Component: intracellular (GO:0005622);; Cellular Component: cell (GO:0005623);; Cellular Component: cytoplasm (GO:0005737);; Cel…	--	--	[R]	General function prediction only	Kelch motif	F-box/kelch-repeat protein At1g15670 OS=Arabidopsis thaliana OX=3702 GN=At1g15670 PE=2 SV=1	S	Function unknown	F-box/kelch-repeat protein At1g15670 [Solanum lycopersicum]
Solyc02g078370.1	333	207	206	542	628	1116	10.105	5.59363	5.59284	14.3865	18.4044	30.9476	0.00308933	1.07793	up	--	--	--	--	--	--	--	--	Anther-specific protein TA-29 OS=Nicotiana tabacum OX=4097 GN=TA-29 PE=2 SV=1	S	Function unknown	anther-specific protein TA-29-like [Solanum lycopersicum]
Solyc10g078910.3	978	1119	1510	744	494	235	14.0209	14.2944	19.3366	9.30839	6.82698	3.06753	0.043889	-0.864527	down	--	--	Cellular Component: integral component of membrane (GO:0016021);;	K23877|2.1e-49|eus:EUTSA_v10018613mg|K23877 xyloglucan O-acetyltransferase | (RefSeq) hypothetical protein	--	--	--	GDSL/SGNH-like Acyl-Esterase family found in Pmr5 and Cas1p	Protein trichome birefringence OS=Arabidopsis thaliana OX=3702 GN=TBR PE=1 SV=1	S	Function unknown	protein trichome birefringence [Solanum lycopersicum]
Solanum_lycopersicum_newGene_2174	21	12	18	61	42	48	0.570744	0.29426	0.445239	1.5169	1.13429	1.232	0.0464924	0.88003	up	--	--	Molecular Function: nucleic acid binding (GO:0003676);; Molecular Function: RNA-DNA hybrid ribonuclease activity (GO:0004523);; Cellular Component: integral component of membrane (GO:0016021);;	--	--	--	--	--	--	S	Function unknown	--
Solyc11g067240.2	2890	2969	3941	2408	1874	1871	43.2	39.5277	52.5914	31.411	26.9991	25.508	0.0186191	-0.645344	down	[O]	Posttranslational modification, protein turnover, chaperones	Molecular Function: ATP binding (GO:0005524);;	K12196|3.4e-247|sly:101256646|K12196 vacuolar protein-sorting-associated protein 4 | (RefSeq) protein SUPPRESSOR OF K(+) TRANSPORT GROWTH DEFECT 1	Endocytosis (ko04144)	[O]	Posttranslational modification, protein turnover, chaperones	ATPase family associated with various cellular activities (AAA)	Protein SUPPRESSOR OF K(+) TRANSPORT GROWTH DEFECT 1 OS=Arabidopsis thaliana OX=3702 GN=SKD1 PE=1 SV=1	O	Posttranslational modification, protein turnover, chaperones	protein SUPPRESSOR OF K(+) TRANSPORT GROWTH DEFECT 1 [Solanum lycopersicum]
Solyc05g008440.3	3076	4252	2737	5195	4987	7020	89.0356	109.623	70.7297	131.247	139.144	185.329	0.0208813	0.636508	up	--	--	--	--	--	--	--	--	--	S	Function unknown	histidine-rich glycoprotein [Solanum lycopersicum]
Solanum_lycopersicum_newGene_1629	158	109	112	61	48	22	3.14258	1.925	1.99302	1.0494	0.919872	0.397179	0.0303219	-0.933411	down	[P]	Inorganic ion transport and metabolism	Molecular Function: calcium-transporting ATPase activity (GO:0005388);; Molecular Function: ATP binding (GO:0005524);; Cellular Component: integral component of membrane (GO:0016021);;	K01537|7.9e-222|spen:107030459|K01537 P-type Ca2+ transporter type 2C [EC:7.2.2.10] | (RefSeq) putative calcium-transporting ATPase 13, plasma membrane-type	--	[P]	Inorganic ion transport and metabolism	Cation transporting ATPase, C-terminus	Putative calcium-transporting ATPase 13, plasma membrane-type OS=Arabidopsis thaliana OX=3702 GN=ACA13 PE=3 SV=1	P	Inorganic ion transport and metabolism	putative calcium-transporting ATPase 13, plasma membrane-type [Solanum pennellii]
Solyc07g061930.1	150	194	141	249	277	320	21.974	25.4557	18.4533	32.0187	39.337	42.9767	0.0219314	0.656358	up	--	--	--	--	--	--	--	--	--	--	--	hypothetical protein EJD97_017482 [Solanum chilense]
Solyc03g053110.3	84	83	24	153	340	282	2.07033	1.81795	0.510259	3.28031	8.07422	6.35112	0.0164516	1.01522	up	[P]	Inorganic ion transport and metabolism	Cellular Component: integral component of membrane (GO:0016021);;	--	--	--	--	Rhodanese-like domain	Rhodanese-like domain-containing protein 9, chloroplastic OS=Arabidopsis thaliana OX=3702 GN=STR9 PE=2 SV=1	V	Defense mechanisms	rhodanese-like domain-containing protein 9, chloroplastic isoform X1 [Solanum lycopersicum]
Solyc05g007880.4	626	529	508	928	872	952	9.43138	7.09913	6.84326	12.2134	12.6778	13.0928	0.00960933	0.605049	up	--	--	Molecular Function: DNA binding (GO:0003677);; Cellular Component: nucleus (GO:0005634);; Biological Process: regulation of transcription, DNA-templated (GO:0006355);;	K16222|2.2e-24|csat:104726841|K16222 Dof zinc finger protein DOF5.5 | (RefSeq) cyclic dof factor 1-like	Circadian rhythm - plant (ko04712)	--	--	--	Cyclic dof factor 1 OS=Arabidopsis thaliana OX=3702 GN=CDF1 PE=1 SV=2	B	Chromatin structure and dynamics	cyclic dof factor 2 isoform X2 [Solanum lycopersicum]
Solyc03g093140.3	1079	1277	1431	2514	1595	2453	14.3195	15.1005	16.9606	29.1323	20.4064	29.7059	0.0219314	0.640059	up	[G]	Carbohydrate transport and metabolism	Cellular Component: integral component of membrane (GO:0016021);; Molecular Function: transmembrane transporter activity (GO:0022857);;	K13783|2.1e-299|sly:101259222|K13783 MFS transporter, OPA family, solute carrier family 37 (glycerol-3-phosphate transporter), member 1/2 | (RefSeq) putative glycerol-3-phosphate transporter 1	--	[G]	Carbohydrate transport and metabolism	Major Facilitator Superfamily	Putative glycerol-3-phosphate transporter 1 OS=Arabidopsis thaliana OX=3702 GN=At3g47420 PE=2 SV=1	G	Carbohydrate transport and metabolism	putative glycerol-3-phosphate transporter 1 [Solanum lycopersicum]
Solyc06g063300.4	395	519	443	1014	691	860	5.89723	6.91101	5.91207	13.2388	9.96333	11.7337	0.000428369	0.780542	up	--	--	--	K15450|2.3e-08|aof:109848458|K15450 tRNA wybutosine-synthesizing protein 3 [EC:2.1.1.282] | (RefSeq) tRNA wybutosine-synthesizing protein 2/3/4 isoform X1	--	[R]	General function prediction only	Galactose oxidase, central domain	F-box/kelch-repeat protein At1g51550 OS=Arabidopsis thaliana OX=3702 GN=At1g51550 PE=2 SV=1	S	Function unknown	F-box/kelch-repeat protein At1g51550 [Solanum lycopersicum]
Solyc09g011660.3	3116	2563	2391	1282	1244	978	98.3114	72.0247	67.3627	35.2917	37.8212	28.1321	5.19129e-06	-1.09148	down	[T]	Signal transduction mechanisms	--	K17609|7.7e-06|eus:EUTSA_v10026931mg|K17609 nucleoredoxin [EC:1.8.1.8] | (RefSeq) hypothetical protein	--	--	--	Universal stress protein family	--	S	Function unknown	universal stress protein PHOS32 [Solanum lycopersicum]
Solyc01g098760.4	494	960	668	337	287	497	7.84299	13.5729	9.45911	4.66106	4.37946	7.19221	0.0339277	-0.764572	down	--	--	Biological Process: metal ion transport (GO:0030001);; Molecular Function: metal ion binding (GO:0046872);;	K18081|6.9e-06|smo:SELMODRAFT_437478|K18081 myotubularin-related protein 1/2 [EC:3.1.3.64 3.1.3.95] | (RefSeq) hypothetical protein	Inositol phosphate metabolism (ko00562);; Phosphatidylinositol signaling system (ko04070)	[P]	Inorganic ion transport and metabolism	Heavy-metal-associated domain	Heavy metal-associated isoprenylated plant protein 32 OS=Arabidopsis thaliana OX=3702 GN=HIPP32 PE=2 SV=1	P	Inorganic ion transport and metabolism	heavy metal-associated isoprenylated plant protein 32 [Solanum lycopersicum]
Solyc02g077880.3	10101	13293	19997	25529	27663	32301	349.408	409.588	617.638	770.721	922.332	1019.09	0.0273852	0.749945	up	--	--	--	--	--	--	--	Dormancy/auxin associated protein	Dormancy-associated protein homolog 1 OS=Arabidopsis thaliana OX=3702 GN=DRMH1 PE=1 SV=1	S	Function unknown	auxin repressed/dormancy associated protein [Solanum lycopersicum]
Solyc09g083280.3	151	117	115	54	67	61	3.82487	2.64764	2.60697	1.17685	1.63014	1.41105	0.0143907	-0.868792	down	--	--	Cellular Component: nucleus (GO:0005634);; Biological Process: regulation of transcription, DNA-templated (GO:0006355);; Biological Process: auxin-activated signaling pathway (GO:0009734);;	K14484|1.7e-108|sly:101055541|K14484 auxin-responsive protein IAA | (RefSeq) IAA1	Plant hormone signal transduction (ko04075)	--	--	AUX/IAA family	Auxin-responsive protein IAA4 OS=Arabidopsis thaliana OX=3702 GN=IAA4 PE=1 SV=2	K	Transcription	IAA1 [Solanum lycopersicum]
Solyc01g100040.3	91	107	102	49	28	48	1.93338	2.02738	1.94777	0.899587	0.557796	0.921809	0.00375086	-0.998038	down	--	--	Molecular Function: protein serine/threonine phosphatase activity (GO:0004722);;	K17506|3.0e-26|mng:MNEG_3991|K17506 protein phosphatase 1L [EC:3.1.3.16] | (RefSeq) hypothetical protein	--	[T]	Signal transduction mechanisms	Protein phosphatase 2C	Probable protein phosphatase 2C 73 OS=Arabidopsis thaliana OX=3702 GN=PPC6-7 PE=2 SV=1	T	Signal transduction mechanisms	probable protein phosphatase 2C 34 [Solanum lycopersicum]
Solyc02g089620.3	275	383	136	113	112	58	3.92153	4.86459	1.72852	1.3993	1.53917	0.74925	0.0374984	-0.904432	down	[E]	Amino acid transport and metabolism	Molecular Function: proline dehydrogenase activity (GO:0004657);; Biological Process: proline catabolic process (GO:0006562);;	K00318|1.3e-282|sly:778202|K00318 proline dehydrogenase [EC:1.5.5.2] | (RefSeq) PDH; proline dehydrogenase	Arginine and proline metabolism (ko00330)	[E]	Amino acid transport and metabolism	Proline dehydrogenase	Proline dehydrogenase 1, mitochondrial OS=Arabidopsis thaliana OX=3702 GN=POX1 PE=1 SV=2	E	Amino acid transport and metabolism	proline dehydrogenase [Solanum lycopersicum]
Solyc02g014190.4	2201	2390	2091	1548	1123	1223	6.97831	6.75162	5.92066	4.28317	3.43113	3.53608	5.22461e-05	-0.775354	down	[O]	Posttranslational modification, protein turnover, chaperones	Molecular Function: molecular_function (GO:0003674);; Molecular Function: binding (GO:0005488);; Molecular Function: protein binding (GO:0005515);; Cellular Component: cellular_component (GO:0005575);; Cellular Component: intracellular (GO:0005622);; Cellular Component: cell (GO:0005623);; Cellular Component: nucleus (GO:0005634);; Cellular Component: cytoplasm (GO:0005737);; Cellular Component: …	K17592|0.0e+00|sly:101259792|K17592 sacsin | (RefSeq) sacsin isoform X1	--	--	--	--	--	O	Posttranslational modification, protein turnover, chaperones	sacsin isoform X1 [Solanum lycopersicum]
Solyc11g069960.2	181	187	296	99	113	99	2.3158	2.13061	3.39289	1.10214	1.39151	1.15654	0.0125852	-0.880293	down	[T]	Signal transduction mechanisms	Molecular Function: protein kinase activity (GO:0004672);; Molecular Function: ATP binding (GO:0005524);; Cellular Component: integral component of membrane (GO:0016021);;	K13415|1.2e-35|mcha:111005517|K13415 protein brassinosteroid insensitive 1 [EC:2.7.10.1 2.7.11.1] | (RefSeq) protein BRASSINOSTEROID INSENSITIVE 1	Plant hormone signal transduction (ko04075)	--	--	Protein tyrosine and serine/threonine kinase	Probable leucine-rich repeat receptor-like protein kinase At1g68400 OS=Arabidopsis thaliana OX=3702 GN=At1g68400 PE=1 SV=1	T	Signal transduction mechanisms	probable leucine-rich repeat receptor-like protein kinase At1g68400 [Solanum lycopersicum]
Solyc04g008500.4	137	113	117	241	190	291	2.06084	1.50991	1.56426	3.16452	2.75453	3.99087	0.0179113	0.753267	up	--	--	Molecular Function: molecular_function (GO:0003674);; Molecular Function: transcription factor activity, sequence-specific DNA binding (GO:0003700);; Biological Process: regulation of transcription, DNA-templated (GO:0006355);; Biological Process: biological_process (GO:0008150);; Biological Process: regulation of biosynthetic process (GO:0009889);; Biological Process: regulation of gene expressi…	K12309|2.5e-82|lja:Lj3g3v0323160.1|K12309 beta-galactosidase [EC:3.2.1.23] | (RefSeq) Lj3g3v0323160.1; -	Galactose metabolism (ko00052);; Other glycan degradation (ko00511);; Glycosaminoglycan degradation (ko00531);; Sphingolipid metabolism (ko00600);; Glycosphingolipid biosynthesis - ganglio series (ko00604)	[R]	General function prediction only	Zinc finger, C2H2 type	Protein indeterminate-domain 4, chloroplastic OS=Arabidopsis thaliana OX=3702 GN=IDD4 PE=1 SV=1	S	Function unknown	protein indeterminate-domain 5, chloroplastic isoform X2 [Solanum lycopersicum]
Solyc02g078900.3	2137	3451	2848	1878	1431	1104	25.744	37.0328	30.6328	19.7425	16.6144	12.1247	0.0099693	-0.806506	down	[C]	Energy production and conversion	Molecular Function: oxidoreductase activity (GO:0016491);;	K17871|0.0e+00|sly:101258913|K17871 NADH:ubiquinone reductase (non-electrogenic) [EC:1.6.5.9] | (RefSeq) internal alternative NAD(P)H-ubiquinone oxidoreductase A1, mitochondrial	--	[C]	Energy production and conversion	Pyridine nucleotide-disulphide oxidoreductase	Internal alternative NAD(P)H-ubiquinone oxidoreductase A2, mitochondrial OS=Arabidopsis thaliana OX=3702 GN=NDA2 PE=1 SV=1	C	Energy production and conversion	internal alternative NAD(P)H-ubiquinone oxidoreductase A1, mitochondrial [Solanum lycopersicum]
Solyc03g117410.2	599	754	700	1006	1050	1250	12.3711	13.873	12.9104	18.1492	20.9261	23.5672	0.00232768	0.592734	up	--	--	Biological Process: regulation of transcription, DNA-templated (GO:0006355);;	K14558|2.2e-12|qsu:111986604|K14558 periodic tryptophan protein 2 | (RefSeq) protein TOPLESS isoform X1	Ribosome biogenesis in eukaryotes (ko03008)	[R]	General function prediction only	--	Protein TOPLESS OS=Arabidopsis thaliana OX=3702 GN=TPL PE=1 SV=1	S	Function unknown	hypothetical protein EJD97_006927 [Solanum chilense]
Solyc02g089330.3	545	555	438	363	315	347	13.232	11.9978	9.50088	7.69702	7.36802	7.67478	0.0135785	-0.586736	down	--	--	Molecular Function: DNA binding (GO:0003677);; Molecular Function: DNA-directed 5'-3' RNA polymerase activity (GO:0003899);; Biological Process: transcription, DNA-templated (GO:0006351);;	K10908|1.1e-170|sly:101248533|K10908 DNA-directed RNA polymerase, mitochondrial [EC:2.7.7.6] | (RefSeq) LOW QUALITY PROTEIN: DNA-directed RNA polymerase 2B, chloroplastic/mitochondrial	--	[KL]	Transcription;; Replication, recombination and repair	DNA-directed RNA polymerase N-terminal	DNA-directed RNA polymerase 2, chloroplastic/mitochondrial OS=Nicotiana sylvestris OX=4096 GN=RPOT2 PE=2 SV=2	--	--	LOW QUALITY PROTEIN: DNA-directed RNA polymerase 2B, chloroplastic/mitochondrial [Solanum lycopersicum]
Solyc05g052550.1	936	1964	1690	809	874	899	74.7091	139.682	120.482	56.3182	67.1939	65.4172	0.0393625	-0.707935	down	--	--	Molecular Function: metal ion binding (GO:0046872);;	--	--	[R]	General function prediction only	--	Zinc finger CCCH domain-containing protein 29 OS=Arabidopsis thaliana OX=3702 GN=At2g40140 PE=1 SV=1	S	Function unknown	zinc finger CCCH domain-containing protein 29 [Solanum lycopersicum]
Solyc10g009550.3	361	416	179	75	119	106	7.17892	7.36585	3.16285	1.2951	2.27455	1.92111	0.00157494	-1.15308	down	--	--	Molecular Function: transcription factor activity, sequence-specific DNA binding (GO:0003700);; Cellular Component: nucleus (GO:0005634);; Molecular Function: sequence-specific DNA binding (GO:0043565);;	K16225|4.5e-17|csat:104760397|K16225 probable WRKY transcription factor 52 | (RefSeq) disease resistance protein RRS1-like	Plant-pathogen interaction (ko04626)	--	--	WRKY DNA -binding domain	Probable WRKY transcription factor 30 OS=Arabidopsis thaliana OX=3702 GN=WRKY30 PE=1 SV=1	K	Transcription	probable WRKY transcription factor 30 [Solanum lycopersicum]
Solyc03g114710.4	379	541	543	300	238	368	6.62527	8.41787	8.47455	4.57243	4.01217	5.864	0.0339277	-0.645933	down	[G]	Carbohydrate transport and metabolism	Molecular Function: UDP-glycosyltransferase activity (GO:0008194);;	K23260|9.6e-67|jre:108988868|K23260 scopoletin glucosyltransferase [EC:2.4.1.128] | (RefSeq) scopoletin glucosyltransferase-like	Phenylpropanoid biosynthesis (ko00940)	[GC]	Carbohydrate transport and metabolism;; Energy production and conversion	UDP-glucoronosyl and UDP-glucosyl transferase	UDP-glycosyltransferase 89B2 OS=Stevia rebaudiana OX=55670 GN=UGT89B2 PE=2 SV=1	--	--	UDP-glycosyltransferase 89B2 [Solanum lycopersicum]
Solyc09g009350.2	333	442	518	246	207	243	4.33327	5.12551	6.02508	2.78762	2.58926	2.88625	0.00181075	-0.823793	down	--	--	Cellular Component: integral component of membrane (GO:0016021);;	K19525|0.0e+00|sly:101262246|K19525 vacuolar protein sorting-associated protein 13A/C | (RefSeq) uncharacterized protein LOC101262246 isoform X2	--	[U]	Intracellular trafficking, secretion, and vesicular transport	Vacuolar sorting-associated protein 13, N-terminal	--	U	Intracellular trafficking, secretion, and vesicular transport	hypothetical protein EJD97_022619 [Solanum chilense]
Solyc03g078630.3	1938	1549	1476	1215	1066	933	49.459	35.2133	33.6394	27.0522	26.2135	21.7092	0.0489336	-0.599429	down	[O]	Posttranslational modification, protein turnover, chaperones	Molecular Function: protein binding (GO:0005515);;	K08770|1.8e-23|ath:AT3G09790|K08770 ubiquitin C | (RefSeq) UBQ8; ubiquitin 8	Ubiquitin mediated proteolysis (ko04120)	[OR]	Posttranslational modification, protein turnover, chaperones;; General function prediction only	Ubiquitin family	Polyubiquitin 8 OS=Arabidopsis thaliana OX=3702 GN=UBQ8 PE=3 SV=1	O	Posttranslational modification, protein turnover, chaperones	polyubiquitin [Solanum lycopersicum]
Solyc07g065980.3	421	956	492	337	292	267	4.27054	8.63686	4.45894	2.97844	2.85633	2.4678	0.0271059	-0.824715	down	[G]	Carbohydrate transport and metabolism	Molecular Function: catalytic activity (GO:0003824);;	K06617|0.0e+00|sly:544236|K06617 raffinose synthase [EC:2.4.1.82] | (RefSeq) SIP; alkaline alpha-galactosidase seed imbibition protein	Galactose metabolism (ko00052)	--	--	Raffinose synthase or seed imbibition protein Sip1	Probable galactinol--sucrose galactosyltransferase 1 OS=Arabidopsis thaliana OX=3702 GN=RFS1 PE=2 SV=1	S	Function unknown	alkaline alpha-galactosidase seed imbibition protein [Solanum lycopersicum]
Solyc01g079880.3	26295	25395	37631	63004	59722	47218	636.236	547.349	813.025	1330.51	1392.9	1042.05	0.0164516	0.736488	up	[E]	Amino acid transport and metabolism	--	--	--	--	--	Aluminium induced protein	Stem-specific protein TSJT1 OS=Nicotiana tabacum OX=4097 GN=TSJT1 PE=2 SV=1	S	Function unknown	stem-specific protein TSJT1 [Solanum lycopersicum]
Solyc07g032110.3	379	373	412	646	565	669	7.14118	6.25629	6.9185	10.6188	10.2557	11.4983	0.00339926	0.587812	up	--	--	Cellular Component: cytoplasm (GO:0005737);;	--	--	--	--	Variant SH3 domain	SH3 domain-containing protein 2 OS=Arabidopsis thaliana OX=3702 GN=SH3P2 PE=1 SV=1	T	Signal transduction mechanisms	SH3 domain-containing protein 2 [Solanum lycopersicum]
Solyc11g022590.1	70	165	191	3518	1597	3371	2.93197	6.22783	7.22672	130.152	65.2505	130.331	1.76449e-22	2.73582	up	--	--	Molecular Function: endopeptidase inhibitor activity (GO:0004866);;	--	--	--	--	Trypsin and protease inhibitor	Miraculin OS=Synsepalum dulcificum OX=3743 PE=1 SV=3	S	Function unknown	uncharacterized protein LOC544001 precursor [Solanum lycopersicum]
Solyc05g005720.4	4364	4782	4672	3333	2838	2132	42.2904	41.2757	40.4306	28.1851	26.5039	18.8408	0.0112395	-0.689304	down	[P]	Inorganic ion transport and metabolism	Molecular Function: potassium ion transmembrane transporter activity (GO:0015079);; Cellular Component: integral component of membrane (GO:0016021);;	K03549|0.0e+00|sly:101254791|K03549 KUP system potassium uptake protein | (RefSeq) putative potassium transporter 12	--	--	--	K+ potassium transporter	Putative potassium transporter 12 OS=Arabidopsis thaliana OX=3702 GN=POT12 PE=1 SV=2	P	Inorganic ion transport and metabolism	putative potassium transporter 12 [Solanum lycopersicum]
Solyc02g088240.4	196	635	606	213	92	87	2.03601	5.90366	5.6388	1.93401	0.923991	0.818901	0.0131118	-1.03226	down	--	--	Cellular Component: integral component of membrane (GO:0016021);;	K24195|4.8e-127|ppp:112273420|K24195 xenotropic and polytropic retrovirus receptor 1 | (RefSeq) phosphate transporter PHO1-like	--	[U]	Intracellular trafficking, secretion, and vesicular transport	EXS family	Phosphate transporter PHO1 homolog 9 OS=Arabidopsis thaliana OX=3702 GN=PHO1-H9 PE=2 SV=1	U	Intracellular trafficking, secretion, and vesicular transport	phosphate transporter PHO1 homolog 3 [Solanum lycopersicum]
Solyc06g060380.3	2937	3906	3521	2493	1923	2048	17.5004	20.7333	18.7346	12.966	11.0472	11.1286	0.000300876	-0.683474	down	--	--	Biological Process: mitotic sister chromatid cohesion (GO:0007064);;	K11267|0.0e+00|sly:101250313|K11267 sister chromatid cohesion protein PDS5 | (RefSeq) sister chromatid cohesion protein PDS5 homolog A isoform X1	--	[D]	Cell cycle control, cell division, chromosome partitioning	--	--	D	Cell cycle control, cell division, chromosome partitioning	sister chromatid cohesion protein PDS5 homolog A isoform X2 [Solanum lycopersicum]
Solyc11g069230.3	100	109	120	186	201	262	2.35585	2.29425	2.51687	3.82495	4.57087	5.63777	0.0092783	0.777835	up	--	--	Molecular Function: SNAP receptor activity (GO:0005484);; Biological Process: intracellular protein transport (GO:0006886);; Cellular Component: integral component of membrane (GO:0016021);;	K08506|3.7e-106|sly:101253454|K08506 syntaxin of plants SYP7 | (RefSeq) syntaxin-71-like	SNARE interactions in vesicular transport (ko04130)	--	--	SNARE domain	Syntaxin-71 OS=Arabidopsis thaliana OX=3702 GN=SYP71 PE=1 SV=1	U	Intracellular trafficking, secretion, and vesicular transport	syntaxin-71-like [Solanum lycopersicum]
Solyc12g011370.3	157	191	152	72	103	65	2.4308	2.63097	2.10322	0.963388	1.52464	0.91786	0.0181308	-0.844935	down	[E]	Amino acid transport and metabolism	Cellular Component: integral component of membrane (GO:0016021);; Molecular Function: transmembrane transporter activity (GO:0022857);;	K03294|2.5e-182|egu:105046703|K03294 basic amino acid/polyamine antiporter, APA family | (RefSeq) cationic amino acid transporter 1-like	--	[E]	Amino acid transport and metabolism	Amino acid permease	Cationic amino acid transporter 8, vacuolar OS=Arabidopsis thaliana OX=3702 GN=CAT8 PE=2 SV=1	E	Amino acid transport and metabolism	cationic amino acid transporter 8, vacuolar [Solanum lycopersicum]
Solyc01g006020.4	189	237	163	291	387	406	5.56678	6.20782	4.27753	7.47864	10.9953	10.9041	0.0275136	0.700865	up	--	--	--	--	--	--	--	--	--	--	--	uncharacterized protein LOC101264357 [Solanum lycopersicum]
Solyc11g011090.1	3634	3653	4935	2970	2622	2217	10.7315	9.60839	13.0142	7.65351	7.46237	5.97116	0.0434843	-0.610875	down	[R]	General function prediction only	Biological Process: signal transduction (GO:0007165);; Molecular Function: ADP binding (GO:0043531);;	K00695|1.8e-113|mtr:MTR_6g478030|K00695 sucrose synthase [EC:2.4.1.13] | (RefSeq) sucrose synthase	Starch and sucrose metabolism (ko00500)	--	--	TIR domain	TMV resistance protein N OS=Nicotiana glutinosa OX=35889 GN=N PE=1 SV=1	T	Signal transduction mechanisms	uncharacterized protein LOC101265700 [Solanum lycopersicum]
Solyc03g114600.4	245	496	379	163	100	140	5.60893	10.1271	7.75714	3.26075	2.2103	2.9258	0.000166827	-1.17335	down	--	--	Cellular Component: integral component of membrane (GO:0016021);;	--	--	[U]	Intracellular trafficking, secretion, and vesicular transport	TLC domain	Protein ASC1 OS=Solanum lycopersicum OX=4081 GN=Asc-1 PE=2 SV=2	U	Intracellular trafficking, secretion, and vesicular transport	protein ASC1 [Solanum lycopersicum]
Solyc02g089140.3	715	589	1229	2379	2205	3943	35.8269	26.2858	55.0261	104.12	106.599	180.385	0.000428369	1.19905	up	--	--	Cellular Component: integral component of membrane (GO:0016021);;	--	--	--	--	NADH-ubiquinone reductase complex 1 MLRQ subunit	--	S	Function unknown	PREDICTED: uncharacterized protein LOC102603988 [Solanum tuberosum]
Solyc07g064740.3	194	238	288	140	144	144	2.36144	2.58117	3.12976	1.48623	1.68444	1.59875	0.0275136	-0.683253	down	--	--	Molecular Function: GTPase activator activity (GO:0005096);;	K18270|0.0e+00|sly:101244206|K18270 Rab3 GTPase-activating protein catalytic subunit | (RefSeq) rab3 GTPase-activating protein catalytic subunit	--	[S]	Function unknown	Rab3 GTPase-activating protein catalytic subunit	--	S	Function unknown	rab3 GTPase-activating protein catalytic subunit [Solanum lycopersicum]
Solyc11g006360.1	919	1281	1033	1714	1648	2388	77.921	96.71	78.1992	126.799	134.695	184.631	0.00413532	0.697185	up	--	--	--	--	--	--	--	--	--	--	--	uncharacterized protein LOC101256540 [Solanum lycopersicum]
Solyc10g006660.3	1810	2037	2188	1105	873	1244	60.2132	60.3495	64.9767	32.073	27.9881	37.7239	7.00928e-07	-0.895105	down	--	--	Molecular Function: calcium ion binding (GO:0005509);;	K24345|1.4e-66|sly:101251823|K24345 calcium-binding protein KIC and related proteins | (RefSeq) calcium-binding protein KRP1	--	[ZD]	Cytoskeleton;; Cell cycle control, cell division, chromosome partitioning	EF-hand domain pair	Calcium-binding protein KRP1 OS=Arabidopsis thaliana OX=3702 GN=KRP1 PE=2 SV=1	--	--	calcium-binding protein KRP1 [Solanum lycopersicum]
Solyc03g121010.4	39	25	29	183	223	48	1.54829	0.904246	1.04884	6.46355	8.73162	1.76693	0.0214849	0.982309	up	--	--	--	--	--	--	--	--	--	--	--	uncharacterized protein LOC107012905 isoform X2 [Solanum pennellii]
Solyc12g005660.2	99	63	54	188	205	249	3.3371	1.87136	1.60937	5.53362	6.67298	7.6623	0.00147813	1.09675	up	--	--	Molecular Function: zinc ion binding (GO:0008270);;	--	--	--	--	B-box zinc finger	Putative zinc finger protein CONSTANS-LIKE 11 OS=Arabidopsis thaliana OX=3702 GN=COL11 PE=1 SV=2	S	Function unknown	Hop-interacting protein THI121 [Solanum lycopersicum]
Solyc03g116360.2	632	738	758	450	471	415	4.82746	5.02269	5.17353	3.00175	3.47083	2.89351	0.00166212	-0.664384	down	[DZ]	Cell cycle control, cell division, chromosome partitioning;; Cytoskeleton	Molecular Function: metal ion binding (GO:0046872);;	K10615|5.4e-35|mis:MICPUN_60437|K10615 E3 ubiquitin-protein ligase HERC4 [EC:2.3.2.26] | (RefSeq) E3 ubiquitin-protein ligase	Ubiquitin mediated proteolysis (ko04120)	--	--	Regulator of chromosome condensation (RCC1) repeat	PH, RCC1 and FYVE domains-containing protein 1 OS=Arabidopsis thaliana OX=3702 GN=PRAF1 PE=1 SV=1	--	--	PH, RCC1 and FYVE domains-containing protein 1 isoform X1 [Solanum lycopersicum]
Solanum_lycopersicum_newGene_371	53	79	105	246	160	381	0.344254	0.4542	0.607148	1.39738	1.00685	2.26936	0.00367252	1.10005	up	--	--	--	--	--	[R]	General function prediction only	--	--	E	Amino acid transport and metabolism	uncharacterized protein LOC107030414 [Solanum pennellii]
Solyc05g007240.1	654	863	748	1253	1185	1361	35.7888	42.0853	36.5398	59.8641	62.5254	67.9486	1.75505e-05	0.660401	up	--	--	--	--	--	--	--	--	--	--	--	uncharacterized protein LOC101261409 [Solanum lycopersicum]
Solyc02g069260.3	19290	19781	19517	14840	11188	10338	153.858	140.536	138.994	103.299	86.0118	75.2013	0.00375086	-0.676176	down	--	--	Molecular Function: nucleic acid binding (GO:0003676);; Biological Process: gene silencing by RNA (GO:0031047);;	K11593|0.0e+00|sly:101249141|K11593 eukaryotic translation initiation factor 2C | (RefSeq) AGO2A; argonaute 2A	--	[J]	Translation, ribosomal structure and biogenesis	Piwi domain	Protein argonaute 2 OS=Arabidopsis thaliana OX=3702 GN=AGO2 PE=1 SV=1	J	Translation, ribosomal structure and biogenesis	argonaute 2A [Solanum lycopersicum]
Solyc09g008820.3	609	809	669	1220	849	1405	13.7492	16.2832	13.4798	24.0608	18.4847	28.9577	0.0352871	0.596236	up	--	--	Molecular Function: molecular_function (GO:0003674);; Molecular Function: binding (GO:0005488);; Molecular Function: carbohydrate binding (GO:0030246);;	--	--	--	--	Phloem protein 2	F-box protein PP2-A15 OS=Arabidopsis thaliana OX=3702 GN=PP2A15 PE=2 SV=1	S	Function unknown	F-box protein PP2-A15 [Solanum lycopersicum]
Solyc07g007390.3	8955	9398	7914	5953	5036	4335	70.1752	65.6021	55.3786	40.711	38.0353	30.9805	0.000565011	-0.754869	down	--	--	Molecular Function: protein binding (GO:0005515);;	K09571|3.8e-10|ini:109170416|K09571 FK506-binding protein 4/5 [EC:5.2.1.8] | (RefSeq) peptidyl-prolyl cis-trans isomerase FKBP62-like	--	[ODR]	Posttranslational modification, protein turnover, chaperones;; Cell cycle control, cell division, chromosome partitioning;; General function prediction only	PB1 domain	Protein PHOX1 OS=Arabidopsis thaliana OX=3702 GN=PHOX1 PE=1 SV=1	--	--	protein PHOX1 [Solanum lycopersicum]
Solyc01g005730.3	2202	2857	3952	1776	1375	756	23.1188	26.7262	37.0543	16.279	13.9137	7.23691	0.0254489	-0.882041	down	--	--	Cellular Component: integral component of membrane (GO:0016021);;	K03131|2.3e-13|ghi:107956070|K03131 transcription initiation factor TFIID subunit 6 | (RefSeq) transcription initiation factor TFIID subunit 6b-like	Basal transcription factors (ko03022)	[R]	General function prediction only	Leucine rich repeat	Receptor-like protein 9DC3 OS=Solanum pimpinellifolium OX=4084 GN=9DC3 PE=3 SV=1	S	Function unknown	receptor-like protein Cf-9 [Solanum lycopersicum]
Solyc01g067890.4	4050	4619	3148	5484	7343	7565	42.164	42.8336	29.2648	49.8281	73.689	71.8345	0.0291502	0.642328	up	[HI]	Coenzyme transport and metabolism;; Lipid transport and metabolism	Molecular Function: 1-deoxy-D-xylulose-5-phosphate synthase activity (GO:0008661);; Cellular Component: chloroplast (GO:0009507);; Biological Process: chlorophyll biosynthetic process (GO:0015995);; Biological Process: terpenoid biosynthetic process (GO:0016114);; Molecular Function: transferase activity, transferring aldehyde or ketonic groups (GO:0016744);;	K01662|0.0e+00|sly:544220|K01662 1-deoxy-D-xylulose-5-phosphate synthase [EC:2.2.1.7] | (RefSeq) dxs; 1-D-deoxyxylulose 5-phosphate synthase	Thiamine metabolism (ko00730);; Terpenoid backbone biosynthesis (ko00900)	[G]	Carbohydrate transport and metabolism	1-deoxy-D-xylulose-5-phosphate synthase	Probable 1-deoxy-D-xylulose-5-phosphate synthase, chloroplastic OS=Capsicum annuum OX=4072 GN=TKT2 PE=2 SV=1	G	Carbohydrate transport and metabolism	1-D-deoxyxylulose 5-phosphate synthase [Solanum lycopersicum]
Solyc02g005606.1	942	1124	684	1568	1490	1956	102.513	109.019	66.4716	148.94	156.334	194.159	0.0107739	0.707217	up	--	--	--	--	--	--	--	--	--	--	--	serine/threonine-protein phosphatase 7 long form homolog [Solanum pennellii]
Solyc01g112105.1	53	94	55	122	188	184	6.64182	10.548	6.09636	13.3643	22.7538	21.1121	0.0184807	0.901008	up	--	--	Molecular Function: N,N-dimethylaniline monooxygenase activity (GO:0004499);; Molecular Function: flavin adenine dinucleotide binding (GO:0050660);; Molecular Function: NADP binding (GO:0050661);;	--	--	--	--	--	--	Q	Secondary metabolites biosynthesis, transport and catabolism	PREDICTED: probable flavin-containing monooxygenase 1 [Solanum tuberosum]
Solanum_lycopersicum_newGene_1899	154	155	177	97	74	109	0.874917	0.785842	0.899036	0.483937	0.407721	0.568308	0.0234132	-0.720312	down	--	--	--	K01303|4.8e-28|fve:101311565|K01303 acylaminoacyl-peptidase [EC:3.4.19.1] | (RefSeq) uncharacterized LOC101311565	--	[R]	General function prediction only	--	--	L	Replication, recombination and repair	hypothetical protein CQW23_26292 [Capsicum baccatum]
Solyc10g084370.3	1295	1161	826	1687	1892	2176	30.4991	24.3636	17.3735	34.6719	42.9476	46.7558	0.0424296	0.640719	up	--	--	Molecular Function: DNA binding (GO:0003677);; Cellular Component: nucleus (GO:0005634);;	K12133|1.9e-26|aip:107624537|K12133 MYB-related transcription factor LHY | (RefSeq) protein LHY isoform X1	Circadian rhythm - plant (ko04712)	[O]	Posttranslational modification, protein turnover, chaperones	Myb-like DNA-binding domain	Protein REVEILLE 8 OS=Arabidopsis thaliana OX=3702 GN=RVE8 PE=2 SV=1	K	Transcription	protein REVEILLE 8 [Solanum lycopersicum]
Solyc11g010670.1	117	277	311	63	98	85	14.5223	30.627	34.4616	6.83575	11.635	9.54378	0.0144976	-0.986562	down	--	--	--	--	--	--	--	--	--	--	--	hypothetical protein EJD97_011823 [Solanum chilense]
Solyc12g008840.2	11531	16916	7238	21472	25231	24590	130.445	170.464	73.1055	211.995	275.126	253.716	0.0377356	0.755576	up	[S]	Function unknown	Molecular Function: beta-galactosidase activity (GO:0004565);; Biological Process: carbohydrate metabolic process (GO:0005975);;	K12309|0.0e+00|brp:103872148|K12309 beta-galactosidase [EC:3.2.1.23] | (RefSeq) beta-galactosidase 2	Galactose metabolism (ko00052);; Other glycan degradation (ko00511);; Glycosaminoglycan degradation (ko00531);; Sphingolipid metabolism (ko00600);; Glycosphingolipid biosynthesis - ganglio series (ko00604)	[G]	Carbohydrate transport and metabolism	Glycosyl hydrolases family 35	Beta-galactosidase OS=Malus domestica OX=3750 PE=1 SV=1	G	Carbohydrate transport and metabolism	beta-galactosidase 4 precursor [Solanum lycopersicum]
Solyc01g108910.4	3595	4220	3721	7108	6840	9641	114.434	119.658	105.751	197.464	209.871	279.895	4.22667e-07	0.901401	up	--	--	Biological Process: pollen tube guidance (GO:0010183);; Molecular Function: mediator complex binding (GO:0036033);;	--	--	--	--	--	CCG-binding protein 1 OS=Arabidopsis thaliana OX=3702 GN=MEE14 PE=1 SV=1	--	--	CCG-binding protein 1 [Solanum lycopersicum]
Solyc03g113620.3	1598	1951	1633	3183	3261	3128	34.0715	37.0528	31.0764	59.2315	67.0206	60.8227	7.72112e-09	0.797461	up	--	--	Molecular Function: DNA binding (GO:0003677);; Cellular Component: nucleus (GO:0005634);;	K08869|7.8e-23|cre:CHLREDRAFT_165812|K08869 aarF domain-containing kinase | (RefSeq) predicted protein	--	--	--	Myb-like DNA-binding domain	Transcription factor MYB1R1 OS=Solanum tuberosum OX=4113 PE=2 SV=1	K	Transcription	transcription factor MYB1R1 [Solanum lycopersicum]
Solyc01g104030.3	1453	1815	1231	833	965	707	14.5016	16.134	10.9676	7.25457	9.28674	6.43419	0.00672884	-0.763182	down	[T]	Signal transduction mechanisms	Molecular Function: voltage-gated potassium channel activity (GO:0005249);; Cellular Component: integral component of membrane (GO:0016021);; Biological Process: regulation of ion transmembrane transport (GO:0034765);;	K21867|0.0e+00|sly:101251722|K21867 potassium channel | (RefSeq) potassium channel AKT2/3 isoform X2	--	[PT]	Inorganic ion transport and metabolism;; Signal transduction mechanisms	Ion transport protein	Potassium channel AKT2/3 OS=Arabidopsis thaliana OX=3702 GN=AKT2 PE=1 SV=1	--	--	potassium channel AKT2/3 isoform X2 [Solanum lycopersicum]
Solyc08g061480.3	380	553	495	289	228	247	5.02313	6.50536	5.83964	3.32892	2.90169	2.97784	0.000183505	-0.852155	down	--	--	Molecular Function: intramolecular lyase activity (GO:0016872);;	--	--	--	--	Chalcone isomerase like	Fatty-acid-binding protein 2 OS=Arabidopsis thaliana OX=3702 GN=FAP2 PE=2 SV=2	S	Function unknown	fatty-acid-binding protein 2 isoform X3 [Solanum lycopersicum]
Solyc03g121180.4	62	63	52	32	25	24	1.19057	1.06122	0.878224	0.534434	0.456457	0.40841	0.0450165	-0.825907	down	[IR]	Lipid transport and metabolism;; General function prediction only	Molecular Function: hydrolase activity, acting on ester bonds (GO:0016788);;	K00679|2.0e-115|cic:CICLE_v10027727mg|K00679 phospholipid:diacylglycerol acyltransferase [EC:2.3.1.158] | (RefSeq) hypothetical protein	Glycerolipid metabolism (ko00561)	--	--	GDSL-like Lipase/Acylhydrolase	GDSL esterase/lipase APG OS=Arabidopsis thaliana OX=3702 GN=APG PE=2 SV=1	L	Replication, recombination and repair	GDSL esterase/lipase APG [Solanum lycopersicum]
Solyc11g010580.2	1178	1044	895	764	575	554	21.2992	16.8194	14.4498	12.0539	10.0218	9.13171	0.0180819	-0.67912	down	--	--	Molecular Function: methyltransferase activity (GO:0008168);; Cellular Component: integral component of membrane (GO:0016021);;	--	--	--	--	Methyltransferase domain	--	S	Function unknown	uncharacterized protein LOC101246201 [Solanum lycopersicum]
Solanum_lycopersicum_newGene_1784	39	93	26	330	244	110	0.466401	0.895477	0.30003	4.18377	2.73148	1.42953	0.0179113	1.00763	up	--	--	--	--	--	--	--	gag-polypeptide of LTR copia-type	--	S	Function unknown	uncharacterized protein LOC112940125 [Solanum lycopersicum]
Solyc03g059110.1	376	409	530	273	242	174	62.0615	60.1099	78.1515	39.3118	38.4695	26.1993	0.0180819	-0.793823	down	--	--	Cellular Component: integral component of membrane (GO:0016021);;	--	--	--	--	--	--	--	--	--
Solyc05g013710.3	112	212	211	80	63	40	2.94258	4.98537	4.9776	1.82259	1.59236	0.951661	0.00611529	-1.05238	down	[O]	Posttranslational modification, protein turnover, chaperones	Molecular Function: molecular_function (GO:0003674);; Cellular Component: cellular_component (GO:0005575);; Cellular Component: intracellular (GO:0005622);; Cellular Component: cell (GO:0005623);; Cellular Component: cytoplasm (GO:0005737);; Biological Process: sulfur compound metabolic process (GO:0006790);; Molecular Function: enzyme activator activity (GO:0008047);; Biological Process: biologi…	K03517|2.0e-51|vvi:100243361|K03517 quinolinate synthase [EC:2.5.1.72] | (RefSeq) quinolinate synthase, chloroplastic	Nicotinate and nicotinamide metabolism (ko00760)	--	--	Fe-S metabolism associated domain	SufE-like protein 2, chloroplastic OS=Arabidopsis thaliana OX=3702 GN=SUFE2 PE=2 SV=1	S	Function unknown	sufE-like protein 2, chloroplastic [Solanum lycopersicum]
Solyc11g071820.3	349	422	227	669	557	675	7.04281	7.59818	4.08619	11.7863	10.8402	12.4416	0.0219314	0.730806	up	--	--	Molecular Function: protein tyrosine kinase activity (GO:0004713);; Molecular Function: ATP binding (GO:0005524);;	K13416|5.1e-27|cmo:103495443|K13416 brassinosteroid insensitive 1-associated receptor kinase 1 [EC:2.7.10.1 2.7.11.1] | (RefSeq) BRASSINOSTEROID INSENSITIVE 1-associated receptor kinase 1-like	MAPK signaling pathway - plant (ko04016);; Plant hormone signal transduction (ko04075);; Plant-pathogen interaction (ko04626)	[T]	Signal transduction mechanisms	Protein tyrosine and serine/threonine kinase	Probable receptor-like protein kinase At1g49730 OS=Arabidopsis thaliana OX=3702 GN=At1g49730 PE=2 SV=1	T	Signal transduction mechanisms	probable receptor-like protein kinase At1g49730 [Solanum lycopersicum]
Solyc07g017510.3	13839	18560	20084	12461	11566	10039	66.9044	79.9265	86.693	52.5753	53.893	44.2626	0.0192094	-0.602707	down	[O]	Posttranslational modification, protein turnover, chaperones	Molecular Function: ATP binding (GO:0005524);; Molecular Function: phosphatidylinositol phosphate kinase activity (GO:0016307);; Molecular Function: metal ion binding (GO:0046872);;	K00921|0.0e+00|sly:101260244|K00921 1-phosphatidylinositol-3-phosphate 5-kinase [EC:2.7.1.150] | (RefSeq) 1-phosphatidylinositol-3-phosphate 5-kinase FAB1B	Inositol phosphate metabolism (ko00562);; Phosphatidylinositol signaling system (ko04070);; Phagosome (ko04145)	[T]	Signal transduction mechanisms	Phosphatidylinositol-4-phosphate 5-Kinase	1-phosphatidylinositol-3-phosphate 5-kinase FAB1B OS=Arabidopsis thaliana OX=3702 GN=FAB1B PE=2 SV=1	T	Signal transduction mechanisms	1-phosphatidylinositol-3-phosphate 5-kinase FAB1B [Solanum lycopersicum]
Solyc08g048290.4	595	817	589	1123	1745	1207	9.56316	11.6936	8.45351	15.7513	27.0402	17.692	0.0101868	0.814915	up	[G]	Carbohydrate transport and metabolism	Cellular Component: integral component of membrane (GO:0016021);; Molecular Function: transmembrane transporter activity (GO:0022857);;	K08150|4.8e-288|sly:101246648|K08150 MFS transporter, SP family, solute carrier family 2 (myo-inositol transporter), member 13 | (RefSeq) probable inositol transporter 2 isoform X1	--	[R]	General function prediction only	Sugar (and other) transporter	Probable inositol transporter 2 OS=Arabidopsis thaliana OX=3702 GN=INT2 PE=1 SV=1	U	Intracellular trafficking, secretion, and vesicular transport	probable inositol transporter 2 isoform X5 [Solanum lycopersicum]
Solyc07g025370.3	127	199	111	213	400	406	1.82096	2.5434	1.42217	2.65946	5.52287	5.30592	0.0377729	0.838207	up	[QV]	Secondary metabolites biosynthesis, transport and catabolism;; Defense mechanisms	Molecular Function: monooxygenase activity (GO:0004497);; Molecular Function: iron ion binding (GO:0005506);; Molecular Function: oxidoreductase activity, acting on paired donors, with incorporation or reduction of molecular oxygen (GO:0016705);; Molecular Function: heme binding (GO:0020037);;	K15639|1.6e-118|mesc:110631173|K15639 PHYB activation tagged suppressor 1 [EC:1.14.-.-] | (RefSeq) cytochrome P450 734A1-like	Brassinosteroid biosynthesis (ko00905)	[QI]	Secondary metabolites biosynthesis, transport and catabolism;; Lipid transport and metabolism	Cytochrome P450	Cytochrome P450 734A1 OS=Arabidopsis thaliana OX=3702 GN=CYP734A1 PE=2 SV=1	Q	Secondary metabolites biosynthesis, transport and catabolism	cytochrome P450 734A1-like [Solanum lycopersicum]
Solanum_lycopersicum_newGene_2355	5	29	27	148	217	93	0.07081	0.393232	0.285249	1.6394	2.41694	0.936985	0.00155753	1.22847	up	--	--	--	--	--	--	--	Domain of unknown function (DUF1985)	--	--	--	uncharacterized protein LOC114074285 [Solanum pennellii]
Solyc04g025650.3	1018	780	826	545	325	413	20.7712	14.1674	15.0474	9.6934	6.38845	7.67398	0.00172741	-0.918278	down	[HC]	Coenzyme transport and metabolism;; Energy production and conversion	Molecular Function: FAD binding (GO:0071949);;	--	--	[CR]	Energy production and conversion;; General function prediction only	FAD binding domain	Monooxygenase 1 OS=Arabidopsis thaliana OX=3702 GN=MO1 PE=2 SV=1	C	Energy production and conversion	monooxygenase 1 [Solanum lycopersicum]
Solyc02g078460.3	4885	5448	4410	7893	7773	9117	98.3338	97.6782	79.2666	138.665	150.807	167.381	1.25187e-05	0.660646	up	--	--	--	--	--	[O]	Posttranslational modification, protein turnover, chaperones	Zinc finger, C3HC4 type (RING finger)	E3 ubiquitin-protein ligase AIRP2 OS=Arabidopsis thaliana OX=3702 GN=AIRP2 PE=1 SV=1	O	Posttranslational modification, protein turnover, chaperones	abscisic acid-insensitive RING protein 4-like [Solanum lycopersicum]
Solyc05g052570.3	3316	6858	5305	2130	2557	2533	72.5393	133.634	103.623	40.6678	53.9135	50.5268	0.00147813	-0.93741	down	--	--	Molecular Function: metal ion binding (GO:0046872);;	K23047|3.3e-47|zju:107406037|K23047 E3 ubiquitin-protein ligase UNKL [EC:2.3.2.27] | (RefSeq) zinc finger CCCH domain-containing protein 2-like isoform X2	--	[R]	General function prediction only	Ankyrin repeats (many copies)	Zinc finger CCCH domain-containing protein 29 OS=Arabidopsis thaliana OX=3702 GN=At2g40140 PE=1 SV=1	S	Function unknown	zinc finger CCCH domain-containing protein 29 [Solanum lycopersicum]
Solyc08g077490.2	299	274	234	166	136	146	4.23664	3.45415	2.956	2.04606	1.85103	1.88614	0.00367252	-0.789937	down	--	--	--	K19525|0.0e+00|sly:101254928|K19525 vacuolar protein sorting-associated protein 13A/C | (RefSeq) uncharacterized protein LOC101254928 isoform X1	--	[U]	Intracellular trafficking, secretion, and vesicular transport	Vacuolar sorting-associated protein 13, N-terminal	--	U	Intracellular trafficking, secretion, and vesicular transport	hypothetical protein EJD97_020565 [Solanum chilense]
Solyc03g119580.1	133	167	167	90	100	77	3.28501	3.68836	3.69139	1.93537	2.37299	1.73853	0.0374984	-0.702928	down	--	--	Molecular Function: DNA binding (GO:0003677);; Molecular Function: transcription factor activity, sequence-specific DNA binding (GO:0003700);; Cellular Component: nucleus (GO:0005634);;	K13434|3.3e-15|pop:7494656|K13434 pathogenesis-related genes transcriptional activator PTI6 | (RefSeq) pathogenesis-related genes transcriptional activator PTI6	Plant-pathogen interaction (ko04626)	--	--	AP2 domain	Ethylene-responsive transcription factor ERF118 OS=Arabidopsis thaliana OX=3702 GN=ERF118 PE=1 SV=1	K	Transcription	uncharacterized protein LOC101265720 [Solanum lycopersicum]
Solyc01g005080.3	426	472	302	619	822	747	5.01652	4.95579	3.17666	6.36834	9.33927	8.02634	0.0339911	0.68813	up	--	--	Biological Process: microtubule cytoskeleton organization (GO:0000226);; Molecular Function: microtubule binding (GO:0008017);;	K16732|0.0e+00|sly:101261948|K16732 protein regulator of cytokinesis 1 | (RefSeq) 65-kDa microtubule-associated protein 6 isoform X1	--	[DZ]	Cell cycle control, cell division, chromosome partitioning;; Cytoskeleton	Microtubule associated protein (MAP65/ASE1 family)	65-kDa microtubule-associated protein 6 OS=Arabidopsis thaliana OX=3702 GN=MAP65-6 PE=1 SV=1	--	--	65-kDa microtubule-associated protein 6 isoform X1 [Solanum lycopersicum]
Solyc09g007790.1	4884	5438	7240	10469	10555	12752	294.314	291.922	389.563	550.606	613.095	700.887	0.00130944	0.785809	up	--	--	--	K20855|7.2e-09|pavi:110763119|K20855 beta-1,3-galactosyltransferase 1/2/3/4/5/7/8 [EC:2.4.1.-] | (RefSeq) probable beta-1,3-galactosyltransferase 2	--	--	--	Senescence regulator	--	S	Function unknown	uncharacterized protein LOC101246954 [Solanum lycopersicum]
Solyc05g012110.4	870	1019	696	1282	1393	1553	19.6189	20.4745	14.0124	25.227	30.295	31.947	0.018535	0.59418	up	[G]	Carbohydrate transport and metabolism	Biological Process: carbohydrate metabolic process (GO:0005975);; Biological Process: pentose-phosphate shunt (GO:0006098);; Molecular Function: 6-phosphogluconolactonase activity (GO:0017057);;	K01057|2.4e-105|sly:101264118|K01057 6-phosphogluconolactonase [EC:3.1.1.31] | (RefSeq) probable 6-phosphogluconolactonase 1	Pentose phosphate pathway (ko00030);; Carbon metabolism (ko01200)	[G]	Carbohydrate transport and metabolism	Glucosamine-6-phosphate isomerases/6-phosphogluconolactonase	Probable 6-phosphogluconolactonase 1 OS=Arabidopsis thaliana OX=3702 GN=PGL1 PE=2 SV=1	G	Carbohydrate transport and metabolism	PREDICTED: probable 6-phosphogluconolactonase 1 [Solanum tuberosum]
Solanum_lycopersicum_newGene_2350	40	66	14	238	398	164	0.656929	0.981932	0.204532	3.46595	6.47245	2.50619	0.000926243	1.27469	up	--	--	--	--	--	--	--	Plant mobile domain	--	--	--	uncharacterized protein LOC104645154 [Solanum lycopersicum]
Solyc02g077470.4	1547	1503	1789	1077	708	747	40.6692	35.203	41.9998	24.7047	17.9397	17.9026	0.000742698	-0.868446	down	--	--	--	K23166|7.3e-84|sly:101266689|K23166 optic atrophy 3 protein | (RefSeq) OPA3-like protein	--	[R]	General function prediction only	Optic atrophy 3 protein (OPA3)	--	S	Function unknown	OPA3-like protein [Solanum lycopersicum]
Solyc12g096120.2	297	409	402	219	206	258	16.4814	20.2216	19.9202	10.6031	11.039	13.0433	0.00830516	-0.671229	down	--	--	Biological Process: protein ufmylation (GO:0071569);;	K12162|6.8e-50|sly:101263096|K12162 ubiquitin-fold modifier 1 | (RefSeq) ubiquitin-fold modifier 1	--	[S]	Function unknown	Ubiquitin fold modifier 1 protein	Ubiquitin-fold modifier 1 OS=Arabidopsis thaliana OX=3702 GN=At1g77710 PE=1 SV=1	S	Function unknown	ubiquitin-fold modifier 1 [Solanum lycopersicum]
Solyc07g056570.1	1652	1466	2532	1107	936	525	26.1172	20.6447	35.7412	15.2675	14.2544	7.56458	0.0349975	-0.845924	down	[Q]	Secondary metabolites biosynthesis, transport and catabolism	Molecular Function: oxidoreductase activity, acting on single donors with incorporation of molecular oxygen, incorporation of two atoms of oxygen (GO:0016702);; Molecular Function: metal ion binding (GO:0046872);;	K09840|0.0e+00|sly:544163|K09840 9-cis-epoxycarotenoid dioxygenase [EC:1.13.11.51] | (RefSeq) LeNCED1; nine-cis-epoxycarotenoid dioxygenase	Carotenoid biosynthesis (ko00906)	[Q]	Secondary metabolites biosynthesis, transport and catabolism	Retinal pigment epithelial membrane protein	9-cis-epoxycarotenoid dioxygenase NCED1, chloroplastic OS=Solanum lycopersicum OX=4081 GN=NCED1 PE=1 SV=2	Q	Secondary metabolites biosynthesis, transport and catabolism	9-cis-epoxycarotenoid dioxygenase [Solanum lycopersicum]
Solanum_lycopersicum_newGene_1821	518	506	735	317	302	298	2.67696	2.32974	3.39121	1.42681	1.50042	1.4022	0.00183864	-0.854647	down	--	--	--	--	--	--	--	--	--	--	--	hypothetical protein EJD97_021918, partial [Solanum chilense]
Solyc09g065390.1	196	189	186	351	399	555	10.1386	8.70704	8.56841	15.823	19.8985	26.2067	0.000428369	0.957349	up	--	--	--	--	--	--	--	--	Protein MARD1 OS=Arabidopsis thaliana OX=3702 GN=MARD1 PE=1 SV=2	--	--	protein MARD1 [Solanum lycopersicum]
Solyc01g096080.3	1716	2143	1719	2675	3563	4043	46.2042	51.4057	41.3462	62.8809	92.5232	99.3403	0.00375086	0.737708	up	--	--	Biological Process: reproduction (GO:0000003);; Biological Process: developmental process involved in reproduction (GO:0003006);; Molecular Function: molecular_function (GO:0003674);; Molecular Function: transcription factor activity, sequence-specific DNA binding (GO:0003700);; Biological Process: regulation of transcription, DNA-templated (GO:0006355);; Biological Process: multicellular organis…	--	--	--	--	Protein of unknown function (DUF688)	Uncharacterized protein At4g00950 OS=Arabidopsis thaliana OX=3702 GN=At4g00950 PE=2 SV=1	S	Function unknown	uncharacterized protein At4g00950 [Solanum lycopersicum]
Solyc12g099020.2	143	179	162	98	98	95	7.55547	8.40824	7.63622	4.49634	4.97327	4.56157	0.0171988	-0.682212	down	--	--	Molecular Function: kinase activity (GO:0016301);;	K17601|3.3e-54|sly:101260031|K17601 WD repeat-containing protein 81 | (RefSeq) protein GFS12 isoform X1	--	[TU]	Signal transduction mechanisms;; Intracellular trafficking, secretion, and vesicular transport	--	Protein GFS12 OS=Arabidopsis thaliana OX=3702 GN=GFS12 PE=1 SV=1	--	--	protein GFS12 isoform X1 [Solanum pennellii]
Solyc01g007750.3	115	107	100	181	171	234	3.13545	2.60314	2.42928	4.31621	4.49105	5.80825	0.0308153	0.679029	up	--	--	Molecular Function: double-stranded DNA binding (GO:0003690);; Biological Process: regulation of transcription, DNA-templated (GO:0006355);;	K15032|8.9e-176|sly:101255820|K15032 mTERF domain-containing protein, mitochondrial | (RefSeq) transcription termination factor MTEF1, chloroplastic isoform X3	--	[KR]	Transcription;; General function prediction only	mTERF	Transcription termination factor MTEF1, chloroplastic OS=Arabidopsis thaliana OX=3702 GN=MTERF1 PE=2 SV=2	K	Transcription	transcription termination factor MTEF1, chloroplastic isoform X3 [Solanum lycopersicum]
Solyc03g053020.4	79	93	94	155	166	244	2.24899	2.36368	2.40415	3.87943	4.57025	6.37805	0.011191	0.828777	up	--	--	--	K00861|9.9e-06|csl:COCSUDRAFT_46821|K00861 riboflavin kinase [EC:2.7.1.26] | (RefSeq) Flavokinase-domain-containing protein	Riboflavin metabolism (ko00740)	--	--	--	--	--	--	uncharacterized protein LOC101264102 isoform X1 [Solanum lycopersicum]
Solyc02g077110.3	279	96	193	50	60	24	5.45539	1.65979	3.36756	0.845631	1.1219	0.427751	0.00950387	-1.06841	down	[I]	Lipid transport and metabolism	Biological Process: lipid metabolic process (GO:0006629);; Molecular Function: phosphatidylcholine 1-acylhydrolase activity (GO:0008970);;	K16818|3.7e-47|han:110944370|K16818 phospholipase A1 [EC:3.1.1.32] | (RefSeq) phospholipase A(1) DAD1, chloroplastic-like	Glycerophospholipid metabolism (ko00564);; alpha-Linolenic acid metabolism (ko00592)	[I]	Lipid transport and metabolism	Lipase (class 3)	Phospholipase A1-II 1 OS=Oryza sativa subsp. indica OX=39946 GN=OsI_03083 PE=3 SV=2	I	Lipid transport and metabolism	phospholipase A1-II 1-like [Solanum lycopersicum]
Solyc07g062490.1	119	125	296	328	562	730	3.79627	3.56571	8.48858	9.19269	17.4074	21.3811	0.0374984	0.905231	up	--	--	Cellular Component: cellular_component (GO:0005575);; Cellular Component: extracellular region (GO:0005576);; Cellular Component: cell wall (GO:0005618);; Cellular Component: intracellular (GO:0005622);; Cellular Component: cell (GO:0005623);; Cellular Component: cytoplasm (GO:0005737);; Cellular Component: vacuole (GO:0005773);; Cellular Component: vacuolar membrane (GO:0005774);; Cellular Compo…	--	--	--	--	D-mannose binding lectin	Epidermis-specific secreted glycoprotein EP1 OS=Daucus carota OX=4039 GN=EP1 PE=1 SV=1	S	Function unknown	epidermis-specific secreted glycoprotein EP1 [Solanum lycopersicum]
Solyc07g007950.1	698	835	929	446	460	295	29.9671	31.9418	35.6252	16.6951	19.0395	11.5416	0.00326176	-0.892178	down	--	--	Molecular Function: calcium ion binding (GO:0005509);;	K13448|5.9e-25|tcc:18602486|K13448 calcium-binding protein CML | (RefSeq) calmodulin-like protein 7	Plant-pathogen interaction (ko04626)	[T]	Signal transduction mechanisms	EF hand	Calmodulin-like protein 3 OS=Arabidopsis thaliana OX=3702 GN=CML3 PE=2 SV=1	T	Signal transduction mechanisms	calmodulin-like protein 3 [Solanum lycopersicum]
Solyc03g113700.3	2549	2436	3024	5830	3710	4936	47.9066	40.7833	50.7506	95.6578	67.2209	84.6326	0.0092783	0.692872	up	--	--	Molecular Function: ubiquitin-protein transferase activity (GO:0004842);; Cellular Component: CCR4-NOT complex (GO:0030014);;	K10643|3.2e-09|sbi:8081424|K10643 CCR4-NOT transcription complex subunit 4 [EC:2.3.2.27] | (RefSeq) uncharacterized protein LOC8081424	RNA degradation (ko03018)	[K]	Transcription	RING/Ubox like zinc-binding domain	--	K	Transcription	RING/Ubox like zinc-binding domain-containing protein [Solanum lycopersicum]
Solyc07g062070.3	345	518	330	636	612	943	4.99628	6.68411	4.25667	8.03265	8.53309	12.4604	0.0347167	0.690289	up	[G]	Carbohydrate transport and metabolism	Molecular Function: ribokinase activity (GO:0004747);; Molecular Function: ATP binding (GO:0005524);; Cellular Component: nucleus (GO:0005634);; Cellular Component: cytoplasm (GO:0005737);; Biological Process: D-ribose catabolic process (GO:0019303);; Molecular Function: metal ion binding (GO:0046872);;	K00852|2.4e-223|sly:101251203|K00852 ribokinase [EC:2.7.1.15] | (RefSeq) uncharacterized protein LOC101251203	Pentose phosphate pathway (ko00030)	[G]	Carbohydrate transport and metabolism	pfkB family carbohydrate kinase	Ribokinase OS=Arabidopsis thaliana OX=3702 GN=RBSK PE=1 SV=1	G	Carbohydrate transport and metabolism	uncharacterized protein LOC101251203 [Solanum lycopersicum]
Solyc02g091180.1	762	1457	1326	560	397	241	43.6858	74.4318	67.8879	28.0282	21.9197	12.6033	0.00162176	-1.12328	down	--	--	--	K03327|8.8e-34|nta:107781954|K03327 multidrug resistance protein, MATE family | (RefSeq) protein DETOXIFICATION 14-like	--	--	--	Domain of unknown function (DUF4228)	--	S	Function unknown	uncharacterized protein LOC104645686 [Solanum lycopersicum]
Solyc04g074870.3	85	129	92	186	199	201	1.79386	2.42151	1.72565	3.42862	4.05792	3.88326	0.0109212	0.756711	up	--	--	Molecular Function: purine nucleoside transmembrane transporter activity (GO:0015211);; Cellular Component: integral component of membrane (GO:0016021);;	K00850|5.2e-42|cpap:110822059|K00850 6-phosphofructokinase 1 [EC:2.7.1.11] | (RefSeq) ATP-dependent 6-phosphofructokinase 6-like	Glycolysis / Gluconeogenesis (ko00010);; Pentose phosphate pathway (ko00030);; Fructose and mannose metabolism (ko00051);; Galactose metabolism (ko00052);; Carbon metabolism (ko01200);; Biosynthesis of amino acids (ko01230);; RNA degradation (ko03018)	--	--	Purine nucleobase transmembrane transport	Purine permease 1 OS=Arabidopsis thaliana OX=3702 GN=PUP1 PE=1 SV=1	S	Function unknown	purine permease 1 [Solanum lycopersicum]
Solyc01g008850.3	5971	5853	8053	4944	3892	3886	104.334	91.0984	125.643	75.3881	65.5469	61.9205	0.0291502	-0.620451	down	[T]	Signal transduction mechanisms	Molecular Function: protein serine/threonine kinase activity (GO:0004674);; Molecular Function: ATP binding (GO:0005524);; Biological Process: signal transduction (GO:0007165);; Cellular Component: integral component of membrane (GO:0016021);;	K07198|3.4e-136|nnu:104611564|K07198 5'-AMP-activated protein kinase, catalytic alpha subunit [EC:2.7.11.11] | (RefSeq) CBL-interacting protein kinase 5-like	--	[T]	Signal transduction mechanisms	Protein kinase domain	CBL-interacting serine/threonine-protein kinase 3 OS=Arabidopsis thaliana OX=3702 GN=CIPK3 PE=1 SV=2	T	Signal transduction mechanisms	CBL-interacting serine/threonine-protein kinase 3 [Solanum lycopersicum]
Solyc12g010820.2	34	63	46	200	103	107	0.693927	1.15813	0.834218	3.61035	2.05583	2.00996	0.0162107	0.965164	up	--	--	--	--	--	--	--	--	--	S	Function unknown	seed biotin-containing protein SBP65-like isoform X1 [Solanum lycopersicum]
Solyc02g086454.1	4382	3451	3075	1663	2043	2358	55.6298	39.0308	34.8616	18.4232	24.9944	27.3039	0.00822254	-0.775535	down	--	--	--	--	--	--	--	--	--	S	Function unknown	titin isoform X1 [Solanum lycopersicum]
Solyc09g083380.4	1093	1385	1317	2960	2213	2779	33.0377	37.2812	35.522	78.0698	64.454	76.6043	2.45399e-09	0.947006	up	--	--	Cellular Component: nucleosome (GO:0000786);; Molecular Function: DNA binding (GO:0003677);; Cellular Component: nucleus (GO:0005634);; Biological Process: nucleosome assembly (GO:0006334);; Cellular Component: host cell nucleus (GO:0042025);;	K11275|8.5e-53|sly:101245495|K11275 histone H1/5 | (RefSeq) histone H1-like	--	--	--	linker histone H1 and H5 family	Histone H1 OS=Pisum sativum OX=3888 PE=2 SV=1	B	Chromatin structure and dynamics	histone H1-like [Solanum lycopersicum]
Solyc04g079420.3	6182	5282	6234	4332	3432	3211	64.3619	48.9779	57.9526	39.3634	34.4348	30.4872	0.00900565	-0.671355	down	[K]	Transcription	Molecular Function: ADP binding (GO:0043531);;	K13457|1.0e-29|qsu:112022409|K13457 disease resistance protein RPM1 | (RefSeq) LOW QUALITY PROTEIN: disease resistance protein RPM1-like	Plant-pathogen interaction (ko04626)	--	--	NB-ARC domain	Probable disease resistance protein At4g33300 OS=Arabidopsis thaliana OX=3702 GN=At4g33300 PE=2 SV=3	S	Function unknown	probable disease resistance protein At4g33300 [Solanum lycopersicum]
Solyc02g087890.4	1280	1384	1371	1901	2010	2917	54.2585	52.2694	51.8992	70.325	82.1418	112.77	0.0185974	0.621731	up	--	--	--	--	--	--	--	--	--	--	--	hypothetical protein EJD97_003996 [Solanum chilense]
Solyc02g078380.3	8429	8981	8131	16093	19127	21781	240.115	227.906	206.825	400.133	525.233	565.964	2.82166e-09	1.02067	up	[E]	Amino acid transport and metabolism	--	--	--	--	--	Aluminium induced protein	Stem-specific protein TSJT1 OS=Nicotiana tabacum OX=4097 GN=TSJT1 PE=2 SV=1	S	Function unknown	stem-specific protein TSJT1 [Solanum lycopersicum]
Solyc01g100240.3	1533	1771	2813	1215	924	680	18.3458	18.8846	30.0647	12.686	10.6522	7.41587	0.0162107	-0.880153	down	--	--	Molecular Function: calmodulin binding (GO:0005516);;	--	--	--	--	Calmodulin binding protein-like	Calmodulin-binding protein 60 C OS=Arabidopsis thaliana OX=3702 GN=CBP60C PE=2 SV=1	S	Function unknown	calmodulin-binding protein 60 C [Solanum lycopersicum]
Solyc09g063150.3	96	158	92	249	256	311	3.08067	4.54402	2.63833	7.00535	7.95293	9.14565	0.00109257	0.974752	up	[O]	Posttranslational modification, protein turnover, chaperones	Molecular Function: protein binding (GO:0005515);;	K00799|4.1e-127|sly:101266972|K00799 glutathione S-transferase [EC:2.5.1.18] | (RefSeq) probable glutathione S-transferase	Glutathione metabolism (ko00480)	[O]	Posttranslational modification, protein turnover, chaperones	Glutathione S-transferase, N-terminal domain	Probable glutathione S-transferase OS=Nicotiana tabacum OX=4097 PE=2 SV=1	O	Posttranslational modification, protein turnover, chaperones	probable glutathione S-transferase [Solanum lycopersicum]
Solyc12g100060.1	9138	11847	8431	20582	14142	21719	543.83	628.023	448.016	1069.06	811.276	1178.92	0.0007429	0.788957	up	--	--	Molecular Function: zinc ion binding (GO:0008270);;	--	--	[R]	General function prediction only	AN1-like Zinc finger	Zinc finger A20 and AN1 domain-containing stress-associated protein 5 OS=Arabidopsis thaliana OX=3702 GN=SAP5 PE=2 SV=1	S	Function unknown	stress-associated protein 10 [Solanum lycopersicum]
Solyc04g079860.1	179	157	226	107	50	41	4.98197	3.87464	5.61986	2.59068	1.32169	1.02485	0.0164614	-0.981745	down	[M]	Cell wall/membrane/envelope biogenesis	Molecular Function: transferase activity, transferring glycosyl groups (GO:0016757);;	K20893|4.6e-194|sly:101247911|K20893 probable galacturonosyltransferase-like 1 [EC:2.4.1.-] | (RefSeq) probable galacturonosyltransferase-like 1	--	--	--	Glycosyl transferase family 8	Probable galacturonosyltransferase-like 1 OS=Arabidopsis thaliana OX=3702 GN=GATL1 PE=2 SV=1	G	Carbohydrate transport and metabolism	probable galacturonosyltransferase-like 1 [Solanum lycopersicum]
Solyc06g076040.3	3316	4273	4912	2530	2197	1178	35.8837	41.1871	47.4674	23.8919	22.9121	11.6258	0.0231258	-0.844855	down	[L]	Replication, recombination and repair	Molecular Function: ubiquitin-protein transferase activity (GO:0004842);; Biological Process: cell surface receptor signaling pathway (GO:0007166);;	K03283|1.6e-17|ppp:112288540|K03283 heat shock 70kDa protein 1/2/6/8 | (RefSeq) uncharacterized protein LOC112288540	Spliceosome (ko03040);; Protein processing in endoplasmic reticulum (ko04141);; Endocytosis (ko04144)	[S]	Function unknown	Armadillo/beta-catenin-like repeat	U-box domain-containing protein 13 OS=Arabidopsis thaliana OX=3702 GN=PUB13 PE=1 SV=1	S	Function unknown	U-box domain-containing protein 13 isoform X1 [Solanum lycopersicum]
Solyc02g092870.2	348	258	368	584	505	670	3.23988	2.13953	3.0651	4.75847	4.54303	5.69834	0.035307	0.663741	up	--	--	--	--	--	--	--	--	--	S	Function unknown	uncharacterized protein LOC101268546 [Solanum lycopersicum]
Solyc12g013700.2	3014	4639	4578	6431	6333	11978	103.49	141.899	140.37	192.755	209.643	375.187	0.0350364	0.757378	up	--	--	--	--	--	--	--	Aluminium induced protein	Stem-specific protein TSJT1 OS=Nicotiana tabacum OX=4097 GN=TSJT1 PE=2 SV=1	S	Function unknown	stem-specific protein TSJT1 [Solanum lycopersicum]
Solyc07g006500.3	5050	5389	3885	6943	7910	10226	47.0027	44.685	32.2893	56.4024	70.9718	86.8184	0.0173052	0.659832	up	[G]	Carbohydrate transport and metabolism	Molecular Function: catalytic activity (GO:0003824);; Cellular Component: cytoplasm (GO:0005737);; Cellular Component: mitochondrion (GO:0005739);; Cellular Component: cytosol (GO:0005829);;	K16055|0.0e+00|sly:100135703|K16055 trehalose 6-phosphate synthase/phosphatase [EC:2.4.1.15 3.1.3.12] | (RefSeq) TPS1; trehalose-6-phosphate synthase	Starch and sucrose metabolism (ko00500)	[G]	Carbohydrate transport and metabolism	Glycosyltransferase family 20	Probable alpha,alpha-trehalose-phosphate synthase [UDP-forming] 11 OS=Arabidopsis thaliana OX=3702 GN=TPS11 PE=2 SV=1	G	Carbohydrate transport and metabolism	trehalose-6-phosphate synthase [Solanum lycopersicum]
Solyc09g010780.3	69	56	70	15	15	29	0.962421	0.689938	0.878286	0.18249	0.191776	0.366783	0.00555517	-1.09643	down	--	--	Molecular Function: protein serine/threonine phosphatase activity (GO:0004722);;	K01102|2.5e-129|gmx:100794388|K01102 pyruvate dehydrogenase phosphatase [EC:3.1.3.43] | (RefSeq) probable protein phosphatase 2C 4	--	[T]	Signal transduction mechanisms	Protein phosphatase 2C	Probable protein phosphatase 2C 23 OS=Arabidopsis thaliana OX=3702 GN=PLL4 PE=2 SV=1	T	Signal transduction mechanisms	probable protein phosphatase 2C 23 [Solanum lycopersicum]
Solanum_lycopersicum_newGene_812	116	99	76	319	222	198	1.39812	1.05879	0.811046	2.61874	2.57181	2.17275	0.00464776	0.974135	up	--	--	--	--	--	--	--	--	--	--	--	hypothetical protein EJD97_017039 [Solanum chilense]
Solyc12g099120.3	7	4	0	46	63	64	0.213299	0.114924	0	1.40408	2.11096	2.03734	0.000166827	1.37955	up	--	--	Molecular Function: DNA binding (GO:0003677);;	K09422|2.3e-134|sly:100271699|K09422 transcription factor MYB, plant | (RefSeq) AIM1; ABA-induced MYB transcription factor	--	[K]	Transcription	Myb-like DNA-binding domain	Transcription factor MYB78 OS=Arabidopsis thaliana OX=3702 GN=MYB78 PE=1 SV=1	K	Transcription	ABA-induced MYB transcription factor isoform X1 [Solanum lycopersicum]
Solyc03g006490.3	322	392	297	650	471	1184	8.74271	9.48335	7.21064	15.4059	12.3215	29.3598	0.0337063	0.825054	up	--	--	--	--	--	--	--	Aluminium induced protein	--	S	Function unknown	glutaminase domain-containing protein [Solanum lycopersicum]
Solyc07g007420.3	4294	4100	3803	6804	6346	7368	56.0708	47.6942	44.3481	77.5511	79.8764	87.7632	2.29471e-05	0.655366	up	--	--	--	--	--	[R]	General function prediction only	--	--	S	Function unknown	LRR receptor-like serine/threonine-protein kinase isoform X1 [Solanum lycopersicum]
Solyc10g008790.3	522	587	491	906	749	1011	10.3593	10.373	8.70519	15.6928	14.3365	18.3144	0.00110894	0.631213	up	--	--	Molecular Function: molecular_function (GO:0003674);; Molecular Function: binding (GO:0005488);; Molecular Function: protein binding (GO:0005515);; Cellular Component: cellular_component (GO:0005575);; Cellular Component: intracellular (GO:0005622);; Cellular Component: cell (GO:0005623);; Cellular Component: nucleus (GO:0005634);; Cellular Component: cytoskeleton (GO:0005856);; Cellular Componen…	--	--	--	--	IQ calmodulin-binding motif	Protein IQ-DOMAIN 1 OS=Arabidopsis thaliana OX=3702 GN=IQD1 PE=1 SV=1	S	Function unknown	SUN family protein SUN28 [Solanum lycopersicum]
Solyc06g074750.1	147	154	98	338	189	297	4.92675	4.61426	2.94588	9.93331	6.11548	9.11598	0.0456807	0.755307	up	--	--	Cellular Component: nucleosome (GO:0000786);; Molecular Function: DNA binding (GO:0003677);; Cellular Component: nucleus (GO:0005634);; Molecular Function: protein heterodimerization activity (GO:0046982);;	K11252|1.5e-97|sot:102593790|K11252 histone H2B | (RefSeq) histone H2B 7-like	--	[B]	Chromatin structure and dynamics	Core histone H2A/H2B/H3/H4	Histone H2B.2 OS=Arabidopsis thaliana OX=3702 GN=At1g08170 PE=2 SV=1	B	Chromatin structure and dynamics	histone H2B.1-like [Solanum lycopersicum]
Solyc10g083730.2	1721	2423	2177	3308	3595	4051	36.4836	45.7543	41.1986	61.19	73.4436	78.3097	0.000474556	0.690181	up	--	--	Molecular Function: molecular_function (GO:0003674);; Molecular Function: binding (GO:0005488);; Molecular Function: carbohydrate binding (GO:0030246);;	--	--	--	--	Phloem protein 2	F-box protein PP2-A15 OS=Arabidopsis thaliana OX=3702 GN=PP2A15 PE=2 SV=1	S	Function unknown	F-box protein PP2-A15 [Solanum lycopersicum]
Solyc07g005720.3	144	129	132	84	70	57	8.48379	6.75105	6.94179	4.33419	3.9768	3.04442	0.0237871	-0.790421	down	--	--	Cellular Component: integral component of membrane (GO:0016021);;	K03260|4.1e-12|pda:103710480|K03260 translation initiation factor 4G | (RefSeq) eukaryotic translation initiation factor-like	RNA transport (ko03013)	[R]	General function prediction only	Proteolipid membrane potential modulator	UPF0057 membrane protein At4g30660 OS=Arabidopsis thaliana OX=3702 GN=At4g30660 PE=3 SV=1	S	Function unknown	UPF0057 membrane protein At4g30660-like [Solanum pennellii]
Solyc01g096730.2	648	625	755	510	304	280	10.4374	8.97359	10.8636	7.17534	4.71851	4.11137	0.0312266	-0.760498	down	[G]	Carbohydrate transport and metabolism	Cellular Component: integral component of membrane (GO:0016021);; Molecular Function: transmembrane transporter activity (GO:0022857);;	K12818|2.4e-90|smo:SELMODRAFT_429199|K12818 ATP-dependent RNA helicase DHX8/PRP22 [EC:3.6.4.13] | (RefSeq) hypothetical protein	Spliceosome (ko03040)	[R]	General function prediction only	Major Facilitator Superfamily	Protein ZINC INDUCED FACILITATOR-LIKE 1 OS=Arabidopsis thaliana OX=3702 GN=ZIFL1 PE=2 SV=1	S	Function unknown	protein ZINC INDUCED FACILITATOR-LIKE 1 [Solanum lycopersicum]
Solyc03g006620.3	1355	1153	1470	949	731	636	29.9897	22.7434	29.0533	18.3276	15.5908	12.8292	0.0162146	-0.719683	down	--	--	Cellular Component: integral component of membrane (GO:0016021);;	--	--	--	--	Cotton fibre expressed protein	--	S	Function unknown	uncharacterized protein LOC101263673 [Solanum lycopersicum]
Solyc10g017960.2	763	945	623	1367	1197	2062	22.5419	24.884	16.4317	35.2653	34.1062	55.6047	0.0110417	0.777373	up	--	--	--	--	--	--	--	Phloem protein 2	F-box protein PP2-A13 OS=Arabidopsis thaliana OX=3702 GN=PP2A13 PE=1 SV=1	S	Function unknown	F-box protein PP2-A13 [Solanum lycopersicum]
Solyc03g053085.1	96	84	71	166	238	230	4.60903	3.61677	3.03341	6.98869	11.0963	10.1251	0.00182597	1.00259	up	--	--	Molecular Function: ribonuclease III activity (GO:0004525);; Biological Process: RNA processing (GO:0006396);;	K11592|1.1e-09|bdi:100838800|K11592 endoribonuclease Dicer [EC:3.1.26.-] | (RefSeq) endoribonuclease Dicer homolog 3b isoform X1	--	--	--	Ribonuclease III domain	Ribonuclease 3-like protein 3 OS=Oryza sativa subsp. japonica OX=39947 GN=Os06g0358800 PE=2 SV=1	A	RNA processing and modification	hypothetical protein EJD97_011488 [Solanum chilense]
Solyc11g056680.1	39	175	26	219	554	516	1.01105	4.07969	0.590231	4.99857	14.0169	12.3352	0.0263774	0.948476	up	--	--	Molecular Function: nucleotide binding (GO:0000166);; Molecular Function: molecular_function (GO:0003674);; Molecular Function: binding (GO:0005488);; Molecular Function: protein binding (GO:0005515);; Cellular Component: cellular_component (GO:0005575);; Cellular Component: intracellular (GO:0005622);; Cellular Component: cell (GO:0005623);; Cellular Component: cytoplasm (GO:0005737);; Cellular …	K00924|3.4e-06|thj:104822048|K00924 kinase [EC:2.7.1.-] | (RefSeq) receptor protein kinase TMK1	--	[R]	General function prediction only	Leucine rich repeat	DNA damage-repair/toleration protein DRT100 OS=Arabidopsis thaliana OX=3702 GN=DRT100 PE=2 SV=2	S	Function unknown	DNA damage-repair/toleration protein DRT100 [Solanum lycopersicum]
Solyc02g085600.1	2605	2795	3774	2121	1571	1831	46.4651	44.4198	60.1253	33.0265	27.0103	29.7899	0.0092783	-0.699025	down	--	--	Molecular Function: transcription factor activity, sequence-specific DNA binding (GO:0003700);; Cellular Component: nucleus (GO:0005634);; Biological Process: regulation of transcription, DNA-templated (GO:0006355);; Biological Process: cell differentiation (GO:0030154);; Molecular Function: sequence-specific DNA binding (GO:0043565);; Biological Process: regulation of shoot system development (G…	K14494|3.7e-25|gmx:100797336|K14494 DELLA protein | (RefSeq) DELLA protein GAI1	Plant hormone signal transduction (ko04075)	--	--	GRAS domain family	Scarecrow-like protein 15 OS=Arabidopsis thaliana OX=3702 GN=SCL15 PE=1 SV=3	K	Transcription	scarecrow-like protein 15 [Solanum lycopersicum]
Solyc04g150139.1	472	567	548	378	354	320	24.3649	26.1022	25.2783	17.0169	17.6286	15.0435	0.00743691	-0.593045	down	--	--	--	K13379|1.2e-24|fve:101306933|K13379 reversibly glycosylated polypeptide / UDP-arabinopyranose mutase [EC:2.4.1.- 5.4.99.30] | (RefSeq) probable UDP-arabinopyranose mutase 5	Amino sugar and nucleotide sugar metabolism (ko00520)	--	--	--	--	--	--	PREDICTED: uncharacterized protein LOC102591502 [Solanum tuberosum]
Solyc04g007870.3	8143	9678	10512	6428	5572	3252	64.2466	68.0244	74.0593	44.2659	42.3755	23.3985	0.0388841	-0.743898	down	--	--	Cellular Component: integral component of membrane (GO:0016021);; Molecular Function: myosin binding (GO:0017022);;	K11844|9.9e-09|cmo:103483482|K11844 ubiquitin carboxyl-terminal hydrolase 16/45 [EC:3.4.19.12] | (RefSeq) ubiquitin carboxyl-terminal hydrolase 2	--	--	--	Zein-binding	Myosin-binding protein 2 OS=Arabidopsis thaliana OX=3702 GN=MYOB2 PE=1 SV=1	S	Function unknown	myosin-binding protein 2 isoform X1 [Solanum lycopersicum]
Solyc01g066570.3	1303	956	1358	1958	2080	2104	39.3413	25.7031	36.6135	51.585	60.5247	57.9313	0.0477316	0.605819	up	--	--	--	--	--	--	--	zinc-finger of the FCS-type, C2-C2	FCS-Like Zinc finger 15 OS=Arabidopsis thaliana OX=3702 GN=FLZ15 PE=1 SV=1	S	Function unknown	uncharacterized protein LOC101258100 [Solanum lycopersicum]
Solyc08g080090.3	4672	5614	5712	3534	2874	2540	109.615	117.336	119.667	72.3725	64.984	54.3607	0.00017186	-0.808007	down	--	--	Cellular Component: cellular_component (GO:0005575);; Cellular Component: intracellular (GO:0005622);; Cellular Component: cell (GO:0005623);; Cellular Component: cytoplasm (GO:0005737);; Cellular Component: chloroplast (GO:0009507);; Cellular Component: plastid envelope (GO:0009526);; Cellular Component: plastid stroma (GO:0009532);; Cellular Component: plastid (GO:0009536);; Cellular Component:…	K22013|4.2e-158|sly:778212|K22013 magnesium dechelatase [EC:4.99.1.10] | (RefSeq) SGR1; senescence-inducible chloroplast stay-green protein 1	Porphyrin and chlorophyll metabolism (ko00860)	--	--	Staygreen protein	Protein STAY-GREEN 1, chloroplastic OS=Solanum lycopersicum OX=4081 GN=SGR1 PE=1 SV=1	S	Function unknown	senescence-inducible chloroplast stay-green protein 1 [Solanum lycopersicum]
Solyc07g042190.3	4912	4742	5469	8450	8834	8331	105.835	91.0052	105.219	158.901	183.468	163.72	0.000540543	0.656523	up	--	--	--	--	--	--	--	zinc-finger of the FCS-type, C2-C2	FCS-Like Zinc finger 14 OS=Arabidopsis thaliana OX=3702 GN=FLZ14 PE=1 SV=1	S	Function unknown	protein MARD1 [Solanum lycopersicum]
Solyc05g051400.4	309	879	677	269	179	217	7.30184	18.4938	14.2871	5.52975	4.06019	4.6677	0.00375086	-1.06528	down	--	--	Biological Process: mitochondrial transport (GO:0006839);; Cellular Component: integral component of membrane (GO:0016021);; Cellular Component: mitochondrial membrane (GO:0031966);;	K15104|7.9e-162|sly:101258657|K15104 solute carrier family 25 (mitochondrial oxoglutarate transporter), member 11 | (RefSeq) mitochondrial uncoupling protein 5-like isoform X1	--	[C]	Energy production and conversion	Mitochondrial carrier protein	Mitochondrial uncoupling protein 5 OS=Arabidopsis thaliana OX=3702 GN=PUMP5 PE=2 SV=1	C	Energy production and conversion	mitochondrial uncoupling protein 5-like isoform X2 [Solanum lycopersicum]
Solyc03g031890.3	1719	1993	2080	3226	3036	4143	50.5745	52.2251	54.6385	82.8209	86.0958	111.172	0.000163498	0.728372	up	--	--	--	--	--	[K]	Transcription	--	--	K	Transcription	uncharacterized protein LOC101258531 [Solanum lycopersicum]
Solyc11g066440.2	6133	7055	6788	5453	3593	3192	93.3686	95.6834	92.2716	72.4572	52.7187	44.3251	0.0349975	-0.653336	down	[PR]	Inorganic ion transport and metabolism;; General function prediction only	Molecular Function: chlorophyllide a oxygenase [overall] activity (GO:0010277);; Molecular Function: 2 iron, 2 sulfur cluster binding (GO:0051537);;	K13071|0.0e+00|sly:543677|K13071 pheophorbide a oxygenase [EC:1.14.15.17] | (RefSeq) lethal leaf spot 1-like protein	Porphyrin and chlorophyll metabolism (ko00860)	--	--	Pheophorbide a oxygenase	Pheophorbide a oxygenase, chloroplastic OS=Arabidopsis thaliana OX=3702 GN=PAO PE=1 SV=1	P	Inorganic ion transport and metabolism	lethal leaf spot 1-like protein [Solanum lycopersicum]
Solyc04g008290.4	533	579	364	1166	1009	849	5.23963	5.06186	3.18996	9.99827	9.55515	7.60921	0.0056391	0.826471	up	--	--	Biological Process: microtubule cytoskeleton organization (GO:0000226);; Molecular Function: microtubule binding (GO:0008017);;	K16732|0.0e+00|sly:101259830|K16732 protein regulator of cytokinesis 1 | (RefSeq) 65-kDa microtubule-associated protein 6	--	[DZ]	Cell cycle control, cell division, chromosome partitioning;; Cytoskeleton	Microtubule associated protein (MAP65/ASE1 family)	65-kDa microtubule-associated protein 6 OS=Arabidopsis thaliana OX=3702 GN=MAP65-6 PE=1 SV=1	--	--	65-kDa microtubule-associated protein 6 [Solanum lycopersicum]
Solyc02g087850.1	269	268	525	163	188	146	6.11741	5.43809	10.6871	3.23866	4.12224	3.0201	0.0457652	-0.815235	down	--	--	Molecular Function: electron carrier activity (GO:0009055);; Molecular Function: protein disulfide oxidoreductase activity (GO:0015035);;	K17479|2.2e-49|sind:105159887|K17479 glutaredoxin domain-containing cysteine-rich protein 1 | (RefSeq) uncharacterized protein At5g39865	--	[O]	Posttranslational modification, protein turnover, chaperones	Glutaredoxin	Uncharacterized protein At3g28850 OS=Arabidopsis thaliana OX=3702 GN=At3g28850 PE=4 SV=1	O	Posttranslational modification, protein turnover, chaperones	uncharacterized protein At3g28850 [Solanum lycopersicum]
Solyc03g111690.4	43478	41065	56084	31033	19459	32858	676.295	568.998	778.956	421.293	291.746	466.166	0.0231258	-0.702478	down	[G]	Carbohydrate transport and metabolism	Molecular Function: pectate lyase activity (GO:0030570);; Biological Process: pectin catabolic process (GO:0045490);; Molecular Function: metal ion binding (GO:0046872);;	K01728|3.8e-240|sly:101254471|K01728 pectate lyase [EC:4.2.2.2] | (RefSeq) SlPL; probable pectate lyase 18 precursor	Pentose and glucuronate interconversions (ko00040)	--	--	Pectate lyase	Probable pectate lyase 18 OS=Arabidopsis thaliana OX=3702 GN=At4g24780 PE=2 SV=2	G	Carbohydrate transport and metabolism	pectate lyase precursor [Solanum lycopersicum]
Solyc02g089260.4	18939	18291	21271	14476	11581	12266	33.925	29.1861	34.0229	22.6319	19.9951	20.0395	0.00172741	-0.625019	down	--	--	Cellular Component: cytosol (GO:0005829);; Molecular Function: zinc ion binding (GO:0008270);; Cellular Component: plasmodesma (GO:0009506);; Biological Process: response to fungus (GO:0009620);; Biological Process: photomorphogenesis (GO:0009640);; Biological Process: response to auxin (GO:0009733);; Biological Process: unidimensional cell growth (GO:0009826);; Biological Process: auxin polar tr…	K10691|0.0e+00|sly:101261294|K10691 E3 ubiquitin-protein ligase UBR4 [EC:2.3.2.27] | (RefSeq) LOW QUALITY PROTEIN: auxin transport protein BIG	--	[T]	Signal transduction mechanisms	E3 ubiquitin-protein ligase UBR4	Auxin transport protein BIG OS=Arabidopsis thaliana OX=3702 GN=BIG PE=1 SV=2	T	Signal transduction mechanisms	LOW QUALITY PROTEIN: auxin transport protein BIG [Solanum lycopersicum]
Solyc04g079530.3	243	222	182	326	494	456	3.21519	2.61191	2.14293	3.76182	6.30951	5.51146	0.0274773	0.751795	up	--	--	Cellular Component: integral component of membrane (GO:0016021);; Molecular Function: transmembrane transporter activity (GO:0022857);;	K14638|0.0e+00|sly:101265330|K14638 solute carrier family 15 (peptide/histidine transporter), member 3/4 | (RefSeq) protein NRT1/ PTR FAMILY 4.5-like	--	[E]	Amino acid transport and metabolism	POT family	Protein NRT1/ PTR FAMILY 4.5 OS=Arabidopsis thaliana OX=3702 GN=NPF4.5 PE=2 SV=1	E	Amino acid transport and metabolism	protein NRT1/ PTR FAMILY 4.5-like [Solanum lycopersicum]
Solyc12g006020.1	42	184	94	13	29	20	0.45378	1.78822	0.906638	0.119886	0.29875	0.190317	0.0122097	-1.04026	down	--	--	Cellular Component: integral component of membrane (GO:0016021);;	K03131|1.2e-09|ghi:107956070|K03131 transcription initiation factor TFIID subunit 6 | (RefSeq) transcription initiation factor TFIID subunit 6b-like	Basal transcription factors (ko03022)	[R]	General function prediction only	Leucine rich repeat	Receptor-like protein 9DC3 OS=Solanum pimpinellifolium OX=4084 GN=9DC3 PE=3 SV=1	T	Signal transduction mechanisms	receptor-like protein 9DC3 [Solanum lycopersicum]
Solyc02g070890.3	5344	4388	8447	3062	2766	1704	39.1456	28.6295	55.252	19.5747	19.5295	11.3799	0.00916806	-0.962344	down	--		Molecular Function: protein kinase activity (GO:0004672);; Molecular Function: ATP binding (GO:0005524);; Cellular Component: integral component of membrane (GO:0016021);;	K13420|5.0e-301|sly:101263667|K13420 LRR receptor-like serine/threonine-protein kinase FLS2 [EC:2.7.11.1] | (RefSeq) LRR receptor-like serine/threonine-protein kinase FLS2	MAPK signaling pathway - plant (ko04016);; Plant-pathogen interaction (ko04626)	--	--	Protein kinase domain	LRR receptor-like serine/threonine-protein kinase FLS2 OS=Arabidopsis thaliana OX=3702 GN=FLS2 PE=1 SV=1	T	Signal transduction mechanisms	LRR receptor-like serine/threonine-protein kinase FLS2 [Solanum lycopersicum]
Solyc03g115980.1	219	156	100	335	362	356	4.50456	2.86307	1.82907	6.00897	7.18196	6.68034	0.0448526	0.796034	up	[C]	Energy production and conversion	Biological Process: photosynthesis (GO:0015979);; Biological Process: chlorophyll biosynthetic process (GO:0015995);; Molecular Function: oxidoreductase activity, acting on the CH-CH group of donors, NAD or NADP as acceptor (GO:0016628);; Molecular Function: geranylgeranyl reductase activity (GO:0045550);;	K10960|1.1e-267|sly:101262299|K10960 geranylgeranyl diphosphate/geranylgeranyl-bacteriochlorophyllide a reductase [EC:1.3.1.83 1.3.1.111] | (RefSeq) geranylgeranyl diphosphate reductase, chloroplastic	Porphyrin and chlorophyll metabolism (ko00860);; Terpenoid backbone biosynthesis (ko00900)	--	--	FAD binding domain	Geranylgeranyl diphosphate reductase, chloroplastic OS=Nicotiana tabacum OX=4097 GN=CHLP PE=2 SV=1	C	Energy production and conversion	geranylgeranyl diphosphate reductase, chloroplastic [Solanum lycopersicum]
Solyc08g079510.3	320	292	446	231	149	135	4.87233	3.95678	6.06494	3.06758	2.1765	1.87298	0.0236028	-0.835346	down	--	--	--	--	--	--	--	--	IRK-interacting protein OS=Arabidopsis thaliana OX=3702 GN=IRKI PE=1 SV=1	--	--	IRK-interacting protein isoform X2 [Solanum lycopersicum]
Solyc04g082530.3	285	311	324	220	199	181	3.36788	3.27109	3.42041	2.26043	2.26637	1.94887	0.0196558	-0.60224	down	--	--	Cellular Component: histone acetyltransferase complex (GO:0000123);; Biological Process: platelet degranulation (GO:0002576);; Molecular Function: protein binding (GO:0005515);; Cellular Component: cellular_component (GO:0005575);; Cellular Component: extracellular region (GO:0005576);; Cellular Component: intracellular (GO:0005622);; Cellular Component: cell (GO:0005623);; Cellular Component: nu…	K22184|0.0e+00|sly:101253085|K22184 bromodomain-containing protein 9 | (RefSeq) uncharacterized protein LOC101253085	--	[R]	General function prediction only	Bromodomain	Transcription factor GTE10 OS=Arabidopsis thaliana OX=3702 GN=GTE10 PE=1 SV=2	S	Function unknown	uncharacterized protein LOC101253085 [Solanum lycopersicum]
Solyc02g084031.1	992	1134	1348	634	743	790	16.4339	16.7408	19.9419	9.16313	11.8718	11.9337	0.0092783	-0.657775	down	--	--	--	K22804|2.3e-12|bna:106442438|K22804 structural maintenance of chromosomes protein 6 | (RefSeq) structural maintenance of chromosomes protein 6B-like	--	--	--	--	--	L	Replication, recombination and repair	uncharacterized protein LOC107009571 isoform X2 [Solanum pennellii]
Solyc12g009240.1	189	385	290	143	131	111	7.26438	13.1653	9.93935	4.78346	4.84253	3.88451	0.00600748	-0.932776	down	--	--	Molecular Function: DNA binding (GO:0003677);; Molecular Function: transcription factor activity, sequence-specific DNA binding (GO:0003700);; Cellular Component: nucleus (GO:0005634);;	K09286|6.1e-23|cpap:110811022|K09286 EREBP-like factor | (RefSeq) ethylene-responsive transcription factor ERF023	--	--	--	AP2 domain	Ethylene-responsive transcription factor ERF017 OS=Arabidopsis thaliana OX=3702 GN=ERF017 PE=2 SV=1	K	Transcription	ethylene-responsive transcription factor ERF017 [Solanum lycopersicum]
Solyc07g150113.1	77	44	136	19	22	11	2.36485	1.21177	3.75046	0.507197	0.657915	0.289423	0.00859634	-1.08393	down	--	--	--	--	--	--	--	--	--	--	--	PREDICTED: F-box protein CPR30-like [Solanum tuberosum]
Solyc01g081570.3	272	367	330	206	196	208	3.74973	4.50939	4.06504	2.48022	2.59655	2.61514	0.00413532	-0.654496	down	--	--	--	--	--	--	--	Neprosin	--	S	Function unknown	uncharacterized protein LOC101264758 [Solanum lycopersicum]
Solyc04g076550.3	1284	1468	1554	1079	952	762	21.543	21.9446	23.2896	15.808	15.4055	11.6548	0.0275136	-0.601009	down	--	--	Cellular Component: integral component of membrane (GO:0016021);;	--	--	[S]	Function unknown	--	Protein SABRE OS=Arabidopsis thaliana OX=3702 GN=SAB PE=1 SV=1	S	Function unknown	protein SABRE isoform X1 [Solanum lycopersicum]
Solyc10g083970.1	1696	2208	1464	793	793	393	41.5616	48.1939	32.0328	16.9536	18.7085	8.76977	0.00109257	-1.09894	down	[H]	Coenzyme transport and metabolism	Molecular Function: methionine adenosyltransferase activity (GO:0004478);; Molecular Function: ATP binding (GO:0005524);; Biological Process: S-adenosylmethionine biosynthetic process (GO:0006556);; Biological Process: one-carbon metabolic process (GO:0006730);; Molecular Function: metal ion binding (GO:0046872);;	K00789|5.5e-228|sly:101245012|K00789 S-adenosylmethionine synthetase [EC:2.5.1.6] | (RefSeq) S-adenosylmethionine synthase 3-like	Cysteine and methionine metabolism (ko00270);; Biosynthesis of amino acids (ko01230)	[H]	Coenzyme transport and metabolism	S-adenosylmethionine synthetase, C-terminal domain	S-adenosylmethionine synthase 3 OS=Solanum lycopersicum OX=4081 GN=SAM3 PE=2 SV=1	H	Coenzyme transport and metabolism	S-adenosylmethionine synthase 3-like [Solanum lycopersicum]
Solyc02g065170.3	69	92	57	34	16	11	0.943983	1.129	0.698344	0.401563	0.204144	0.134932	0.0180819	-1.00168	down	[DPM]	Cell cycle control, cell division, chromosome partitioning;; Inorganic ion transport and metabolism;; Cell wall/membrane/envelope biogenesis	Molecular Function: copper ion binding (GO:0005507);; Molecular Function: oxidoreductase activity (GO:0016491);;	K19791|0.0e+00|sly:101263571|K19791 iron transport multicopper oxidase | (RefSeq) L-ascorbate oxidase homolog	--	[Q]	Secondary metabolites biosynthesis, transport and catabolism	Multicopper oxidase	L-ascorbate oxidase homolog OS=Brassica napus OX=3708 GN=Bp10 PE=2 SV=1	Q	Secondary metabolites biosynthesis, transport and catabolism	L-ascorbate oxidase homolog [Solanum lycopersicum]
Solyc02g070875.1	685	812	894	564	523	432	35.9569	38.0058	41.9304	25.8323	26.4664	20.6932	0.0192094	-0.626341	down	--	--	Molecular Function: protein dimerization activity (GO:0046983);;	K15920|2.7e-12|oeu:111408286|K15920 xylan 1,4-beta-xylosidase [EC:3.2.1.37] | (RefSeq) beta-xylosidase/alpha-L-arabinofuranosidase 2-like	Amino sugar and nucleotide sugar metabolism (ko00520)	--	--	--	--	--	--	hypothetical protein CQW23_04167 [Capsicum baccatum]
Solyc12g096330.3	71	101	91	154	148	168	3.82194	4.84465	4.39854	7.27672	7.74946	8.31735	0.0296908	0.67155	up	[J]	Translation, ribosomal structure and biogenesis	Biological Process: rRNA processing (GO:0006364);; Molecular Function: methyltransferase activity (GO:0008168);;	K00783|4.3e-49|sly:101244853|K00783 23S rRNA (pseudouridine1915-N3)-methyltransferase [EC:2.1.1.177] | (RefSeq) putative RNA methyltransferase At5g10620 isoform X1	--	--	--	Predicted SPOUT methyltransferase	Putative RNA methyltransferase At5g10620 OS=Arabidopsis thaliana OX=3702 GN=At5g10620 PE=3 SV=1	J	Translation, ribosomal structure and biogenesis	putative RNA methyltransferase At5g10620 isoform X1 [Solanum lycopersicum]
Solanum_lycopersicum_newGene_360	165	168	163	313	252	401	1.15035	1.11828	1.02534	2.03277	1.55384	3.102	0.00586357	0.772676	up	--	--	--	--	--	--	--	--	--	--	--	uncharacterized protein LOC104644792 [Solanum lycopersicum]
Solyc02g086452.1	5595	4327	3620	1841	2108	2820	39.8927	27.4858	23.0481	11.458	14.4845	18.3416	0.00367252	-0.883275	down	--	--	--	--	--	--	--	--	--	S	Function unknown	titin isoform X3 [Solanum lycopersicum]
Solyc08g007310.3	1030	1201	1357	809	770	628	11.5146	11.9638	13.5552	7.89307	8.30013	6.40337	0.0094909	-0.668828	down	[M]	Cell wall/membrane/envelope biogenesis	Biological Process: protein glycosylation (GO:0006486);; Molecular Function: transferase activity, transferring glycosyl groups (GO:0016757);;	K18789|2.6e-87|psom:113282164|K18789 xylogalacturonan beta-1,3-xylosyltransferase [EC:2.4.2.41] | (RefSeq) probable glycosyltransferase At5g20260	--	[GMW]	Carbohydrate transport and metabolism;; Cell wall/membrane/envelope biogenesis;; Extracellular structures	Exostosin family	Probable glycosyltransferase At5g03795 OS=Arabidopsis thaliana OX=3702 GN=At5g03795 PE=3 SV=2	--	--	probable glycosyltransferase At5g25310 [Solanum lycopersicum]
Solyc03g111997.1	67	105	87	135	177	187	2.15155	2.98968	2.47375	3.76092	5.46515	5.47174	0.0464924	0.719747	up	--	--	Molecular Function: iron ion binding (GO:0005506);; Molecular Function: oxidoreductase activity, acting on paired donors, with incorporation or reduction of molecular oxygen (GO:0016705);; Molecular Function: heme binding (GO:0020037);;	K20617|3.2e-127|nau:109209709|K20617 cytochrome P450 family 71 subfamily A | (RefSeq) cytochrome P450 71A3-like	--	[Q]	Secondary metabolites biosynthesis, transport and catabolism	Cytochrome P450	Cytochrome P450 71A3 (Fragment) OS=Solanum melongena OX=4111 GN=CYP71A3 PE=2 SV=1	Q	Secondary metabolites biosynthesis, transport and catabolism	hypothetical protein EJD97_018983, partial [Solanum chilense]
Solyc09g065160.4	753	976	653	1269	1240	1538	6.90321	7.96731	5.34151	10.1522	10.9579	12.8588	0.00691549	0.645784	up	[L]	Replication, recombination and repair	Molecular Function: catalytic activity (GO:0003824);; Molecular Function: GTP binding (GO:0005525);;	--	--	[O]	Posttranslational modification, protein turnover, chaperones	Dynamin family	Probable transmembrane GTPase FZO-like, chloroplastic OS=Arabidopsis thaliana OX=3702 GN=FZL PE=1 SV=1	O	Posttranslational modification, protein turnover, chaperones	probable transmembrane GTPase FZO-like, chloroplastic isoform X1 [Solanum lycopersicum]
Solyc07g007170.3	549	734	734	454	397	463	20.9579	24.9374	25.0149	15.1172	14.5879	16.0887	0.00375086	-0.619914	down	--	--	--	--	--	[O]	Posttranslational modification, protein turnover, chaperones	--	--	O	Posttranslational modification, protein turnover, chaperones	uncharacterized protein LOC101251003 [Solanum lycopersicum]
Solyc01g106890.2	119	136	148	254	223	246	6.32004	6.46413	7.04421	11.8324	11.5051	11.9813	0.00520643	0.701948	up	--	--	--	--	--	--	--	--	--	--	--	uncharacterized protein LOC101261663 [Solanum lycopersicum]
Solyc01g080010.2	265	359	464	896	705	2049	4.93949	5.9647	7.74397	14.614	12.6951	34.9353	0.00464776	1.08691	up	--	--	Molecular Function: aspartic-type endopeptidase activity (GO:0004190);;	K22683|6.6e-20|cit:102620377|K22683 aspartyl protease family protein [EC:3.4.23.-] | (RefSeq) aspartyl protease family protein 2	--	[O]	Posttranslational modification, protein turnover, chaperones	Xylanase inhibitor C-terminal	Probable aspartic proteinase GIP2 OS=Nicotiana benthamiana OX=4100 GN=GIP2 PE=1 SV=1	O	Posttranslational modification, protein turnover, chaperones	xyloglucan-specific fungal endoglucanase inhibitor protein precursor [Solanum lycopersicum]
Solyc02g084260.3	246	307	315	178	189	151	6.51987	7.26173	7.4636	4.11059	4.83679	3.64585	0.0177739	-0.686243	down	--	--	Molecular Function: ATP binding (GO:0005524);; Biological Process: protein folding (GO:0006457);; Molecular Function: unfolded protein binding (GO:0051082);;	K08739|1.1e-11|cann:107859776|K08739 DNA mismatch repair protein MLH3 | (RefSeq) DNA mismatch repair protein MLH3	Mismatch repair (ko03430)	--	--	--	--	--	--	PREDICTED: DNA mismatch repair protein MLH3 isoform X3 [Capsicum annuum]
Solyc08g079750.3	580	884	655	1663	1175	1432	6.99943	9.51049	7.05376	17.5262	13.6708	15.7687	0.000172216	0.858165	up	[E]	Amino acid transport and metabolism	Molecular Function: catalytic activity (GO:0003824);; Biological Process: biosynthetic process (GO:0009058);; Cellular Component: integral component of membrane (GO:0016021);; Molecular Function: pyridoxal phosphate binding (GO:0030170);;	K14270|0.0e+00|sly:101257494|K14270 aminotransferase | (RefSeq) probable aminotransferase ACS10 isoform X2	--	[T]	Signal transduction mechanisms	Aminotransferase class I and II	Probable aminotransferase ACS10 OS=Arabidopsis thaliana OX=3702 GN=ACS10 PE=1 SV=1	T	Signal transduction mechanisms	probable aminotransferase ACS10 isoform X2 [Solanum lycopersicum]
Solyc07g007400.3	1934	1904	2152	4398	3932	5323	104.089	91.2672	103.392	206.617	203.989	261.3	6.90659e-10	1.04309	up	--	--	Molecular Function: protein binding (GO:0005515);;	--	--	[R]	General function prediction only	Leucine rich repeat	--	S	Function unknown	Leucine-rich repeat, cysteine-containing subtype [Corchorus olitorius]
Solyc11g017240.3	294	260	275	200	115	139	10.9464	8.60493	9.13503	6.49986	4.10804	4.70774	0.0234132	-0.761415	down	--	--	Molecular Function: chorismate mutase activity (GO:0004106);; Biological Process: aromatic amino acid family biosynthetic process (GO:0009073);; Biological Process: chorismate metabolic process (GO:0046417);;	K01850|5.7e-141|sly:543970|K01850 chorismate mutase [EC:5.4.99.5] | (RefSeq) chorimate mutase	Phenylalanine, tyrosine and tryptophan biosynthesis (ko00400);; Biosynthesis of amino acids (ko01230)	[E]	Amino acid transport and metabolism	--	Chorismate mutase 2 OS=Arabidopsis thaliana OX=3702 GN=CM2 PE=1 SV=1	E	Amino acid transport and metabolism	chorimate mutase [Solanum lycopersicum]
Solyc01g108840.3	1149	1573	1786	1052	840	795	9.46529	11.5451	13.1392	7.56295	6.66883	5.97313	0.0143364	-0.693539	down	[T]	Signal transduction mechanisms	Molecular Function: protein serine/threonine kinase activity (GO:0004674);; Molecular Function: ATP binding (GO:0005524);; Cellular Component: integral component of membrane (GO:0016021);;	K00924|0.0e+00|nto:104111279|K00924 kinase [EC:2.7.1.-] | (RefSeq) receptor protein kinase TMK1-like	--	--	--	Protein kinase domain	Receptor protein kinase TMK1 OS=Arabidopsis thaliana OX=3702 GN=TMK1 PE=1 SV=1	T	Signal transduction mechanisms	receptor protein kinase TMK1-like isoform X1 [Solanum lycopersicum]
Solyc02g086456.1	1085	810	818	466	526	611	59.5889	39.636	40.1012	22.323	27.8595	30.6148	0.0184854	-0.706104	down	--	--	--	--	--	--	--	--	--	S	Function unknown	PREDICTED: titin isoform X6 [Solanum tuberosum]
Solyc01g100690.3	1936	1911	2898	4350	3106	5037	59.2448	52.0851	79.2005	116.221	91.6339	140.64	0.0435953	0.679087	up	--	--	Cellular Component: integral component of membrane (GO:0016021);;	--	--	--	--	--	--	--	--	uncharacterized protein LOC101252823 [Solanum lycopersicum]
Solyc11g066060.3	16654	18410	13309	9789	8306	5581	218.989	215.643	156.262	112.339	105.27	66.9268	0.00367252	-0.887892	down	[O]	Posttranslational modification, protein turnover, chaperones	Molecular Function: ATP binding (GO:0005524);;	K03283|0.0e+00|sly:101254866|K03283 heat shock 70kDa protein 1/2/6/8 | (RefSeq) heat shock cognate 70 kDa protein 2-like	Spliceosome (ko03040);; Protein processing in endoplasmic reticulum (ko04141);; Endocytosis (ko04144)	[O]	Posttranslational modification, protein turnover, chaperones	Hsp70 protein	Heat shock cognate 70 kDa protein 1 OS=Solanum lycopersicum OX=4081 GN=HSC-I PE=2 SV=1	O	Posttranslational modification, protein turnover, chaperones	heat shock cognate 70 kDa protein 2-like [Solanum lycopersicum]
Solyc01g097910.2	101	158	98	251	172	305	2.65955	3.7335	2.30001	5.79561	4.38928	7.38219	0.0393625	0.758092	up	[C]	Energy production and conversion	Molecular Function: iron ion binding (GO:0005506);; Cellular Component: integral component of membrane (GO:0016021);;	--	--	--	--	Rubredoxin	--	C	Energy production and conversion	uncharacterized protein LOC101245698 [Solanum lycopersicum]
Solyc03g019820.3	102	148	108	173	358	406	2.61338	3.36903	2.47018	3.86512	8.83328	9.49209	0.0186191	0.925494	up	[G]	Carbohydrate transport and metabolism	Molecular Function: water channel activity (GO:0015250);; Cellular Component: integral component of membrane (GO:0016021);;	K09873|5.1e-145|sly:101251154|K09873 aquaporin TIP | (RefSeq) probable aquaporin TIP3-2-like	--	[G]	Carbohydrate transport and metabolism	Major intrinsic protein	Probable aquaporin TIP3-2 OS=Arabidopsis thaliana OX=3702 GN=TIP3-2 PE=2 SV=1	P	Inorganic ion transport and metabolism	probable aquaporin TIP3-2-like [Solanum lycopersicum]
Solyc03g114150.3	1702	1758	1026	822	868	583	25.4468	23.4131	13.6966	10.7268	12.5092	7.95067	0.0219314	-0.806532	down	[C]	Energy production and conversion	Molecular Function: oxidoreductase activity, acting on the aldehyde or oxo group of donors, NAD or NADP as acceptor (GO:0016620);;	K00128|0.0e+00|sly:101250104|K00128 aldehyde dehydrogenase (NAD+) [EC:1.2.1.3] | (RefSeq) SlALDH2B7a; aldehyde dehydrogenase family 2 member B7a	Glycolysis / Gluconeogenesis (ko00010);; Ascorbate and aldarate metabolism (ko00053);; Fatty acid degradation (ko00071);; Valine, leucine and isoleucine degradation (ko00280);; Lysine degradation (ko00310);; Arginine and proline metabolism (ko00330);; Histidine metabolism (ko00340);; Tryptophan metabolism (ko00380);; beta-Alanine metabolism (ko00410);; Glycerolipid metabolism (ko00561);; Pyruvate…	[C]	Energy production and conversion	Aldehyde dehydrogenase family	Aldehyde dehydrogenase family 2 member B4, mitochondrial OS=Arabidopsis thaliana OX=3702 GN=ALDH2B4 PE=1 SV=1	C	Energy production and conversion	aldehyde dehydrogenase family 2 member B7a [Solanum lycopersicum]
Solyc12g010900.1	1052	1150	944	1688	1617	1926	13.9341	13.5713	11.1648	19.5219	20.6482	23.2809	8.00814e-05	0.641308	up	--	--	Cellular Component: ubiquitin ligase complex (GO:0000151);; Biological Process: response to acid chemical (GO:0001101);; Cellular Component: cellular_component (GO:0005575);; Cellular Component: intracellular (GO:0005622);; Cellular Component: cell (GO:0005623);; Cellular Component: nucleus (GO:0005634);; Biological Process: cellular protein modification process (GO:0006464);; Biological Process:…	--	--	--	--	F-box	F-box/LRR-repeat MAX2 homolog A OS=Petunia hybrida OX=4102 GN=MAX2A PE=1 SV=1	S	Function unknown	F-box/LRR-repeat MAX2 homolog A-like [Solanum lycopersicum]
Solyc03g123570.3	7690	8766	10739	6996	5142	4678	34.9701	35.5082	43.6072	27.7669	22.5398	19.4014	0.0308103	-0.648487	down	[O]	Posttranslational modification, protein turnover, chaperones	Molecular Function: ATP binding (GO:0005524);; Molecular Function: phosphatidylinositol phosphate kinase activity (GO:0016307);; Molecular Function: metal ion binding (GO:0046872);;	K00921|0.0e+00|sly:101246905|K00921 1-phosphatidylinositol-3-phosphate 5-kinase [EC:2.7.1.150] | (RefSeq) 1-phosphatidylinositol-3-phosphate 5-kinase FAB1B-like isoform X2	Inositol phosphate metabolism (ko00562);; Phosphatidylinositol signaling system (ko04070);; Phagosome (ko04145)	[T]	Signal transduction mechanisms	Phosphatidylinositol-4-phosphate 5-Kinase	1-phosphatidylinositol-3-phosphate 5-kinase FAB1B OS=Arabidopsis thaliana OX=3702 GN=FAB1B PE=2 SV=1	T	Signal transduction mechanisms	1-phosphatidylinositol-3-phosphate 5-kinase FAB1B-like isoform X2 [Solanum lycopersicum]
Solyc12g098310.2	3134	3854	2610	5432	5656	6048	115.788	126.818	86.0835	175.166	201.409	203.787	0.000465286	0.723223	up	--	--	Molecular Function: cyclin-dependent protein serine/threonine kinase inhibitor activity (GO:0004861);; Cellular Component: nucleus (GO:0005634);; Biological Process: cell cycle arrest (GO:0007050);;	K03035|2.9e-06|ppp:112294753|K03035 26S proteasome regulatory subunit N5 | (RefSeq) 26S proteasome non-ATPase regulatory subunit 12-like isoform X1	Proteasome (ko03050)	--	--	Cyclin-dependent kinase inhibitor	Cyclin-dependent kinase inhibitor 4 OS=Oryza sativa subsp. japonica OX=39947 GN=KRP4 PE=2 SV=2	S	Function unknown	cyclin-dependent kinase inhibitor 4-like [Solanum lycopersicum]
Solyc11g061720.1	10	21	16	69	110	66	0.214307	0.427265	0.331615	1.42465	2.50693	1.42853	0.000300876	1.3388	up	[M]	Cell wall/membrane/envelope biogenesis	Molecular Function: protein serine/threonine kinase activity (GO:0004674);; Molecular Function: ATP binding (GO:0005524);;	K08286|5.0e-131|dcr:108227333|K08286 protein-serine/threonine kinase [EC:2.7.11.-] | (RefSeq) serine/threonine-protein kinase UCN-like	--	[R]	General function prediction only	Protein kinase domain	Serine/threonine-protein kinase UCN OS=Arabidopsis thaliana OX=3702 GN=UNC PE=1 SV=1	T	Signal transduction mechanisms	serine/threonine-protein kinase UCN-like [Solanum lycopersicum]
Solyc02g084250.4	175	169	198	105	117	113	4.45527	3.83679	4.4966	2.33445	2.85426	2.61323	0.0414104	-0.641648	down	--	--	Biological Process: mismatch repair (GO:0006298);; Molecular Function: ATPase activity (GO:0016887);; Cellular Component: mismatch repair complex (GO:0032300);;	K08739|4.7e-20|sot:102597269|K08739 DNA mismatch repair protein MLH3 | (RefSeq) DNA mismatch repair protein MLH3	Mismatch repair (ko03430)	[L]	Replication, recombination and repair	--	DNA mismatch repair protein MLH3 OS=Arabidopsis thaliana OX=3702 GN=MLH3 PE=2 SV=2	--	--	PREDICTED: DNA mismatch repair protein MLH3 isoform X4 [Solanum tuberosum]
Solyc12g010440.3	1595	1115	1615	941	463	336	30.1403	18.7546	27.2433	15.5087	8.42352	5.77615	0.026025	-0.913832	down	[G]	Carbohydrate transport and metabolism	Cellular Component: integral component of membrane (GO:0016021);; Molecular Function: transmembrane transporter activity (GO:0022857);; Biological Process: phosphate ion homeostasis (GO:0055062);;	K13783|5.0e-282|sly:101249891|K13783 MFS transporter, OPA family, solute carrier family 37 (glycerol-3-phosphate transporter), member 1/2 | (RefSeq) putative glycerol-3-phosphate transporter 5	--	[G]	Carbohydrate transport and metabolism	Major Facilitator Superfamily	Putative glycerol-3-phosphate transporter 5 OS=Arabidopsis thaliana OX=3702 GN=At2g13100 PE=2 SV=2	G	Carbohydrate transport and metabolism	putative glycerol-3-phosphate transporter 5 [Solanum lycopersicum]
Solyc09g075600.3	56	92	84	166	115	193	6.6928	9.75887	8.88577	17.2949	13.2075	21.0304	0.048905	0.749676	up	--	--	--	--	--	--	--	--	--	--	--	uncharacterized protein LOC101261956 [Solanum lycopersicum]
Solyc07g005660.4	1180	1804	1441	2190	2167	3001	20.6161	28.075	22.4714	33.3854	36.4962	47.8298	0.0219314	0.609458	up	--	--	Molecular Function: purine nucleoside transmembrane transporter activity (GO:0015211);; Cellular Component: integral component of membrane (GO:0016021);;	K00850|2.1e-18|cpap:110822059|K00850 6-phosphofructokinase 1 [EC:2.7.1.11] | (RefSeq) ATP-dependent 6-phosphofructokinase 6-like	Glycolysis / Gluconeogenesis (ko00010);; Pentose phosphate pathway (ko00030);; Fructose and mannose metabolism (ko00051);; Galactose metabolism (ko00052);; Carbon metabolism (ko01200);; Biosynthesis of amino acids (ko01230);; RNA degradation (ko03018)	--	--	Purine nucleobase transmembrane transport	Probable purine permease 5 OS=Arabidopsis thaliana OX=3702 GN=PUP5 PE=3 SV=2	S	Function unknown	probable purine permease 5 isoform X1 [Solanum lycopersicum]
Solyc03g115610.3	968	711	867	1652	1462	1480	7.35442	4.81121	5.8804	10.9582	10.7117	10.2587	0.0094909	0.691214	up	[M]	Cell wall/membrane/envelope biogenesis	Molecular Function: protein serine/threonine kinase activity (GO:0004674);; Molecular Function: ATP binding (GO:0005524);; Cellular Component: integral component of membrane (GO:0016021);;	K13415|5.8e-65|ats:109753909|K13415 protein brassinosteroid insensitive 1 [EC:2.7.10.1 2.7.11.1] | (RefSeq) LOC109753909; systemin receptor SR160	Plant hormone signal transduction (ko04075)	--	--	Protein kinase domain	Probable LRR receptor-like serine/threonine-protein kinase At1g74360 OS=Arabidopsis thaliana OX=3702 GN=At1g74360 PE=1 SV=1	T	Signal transduction mechanisms	probable LRR receptor-like serine/threonine-protein kinase At1g74360 [Solanum lycopersicum]
Solyc03g116530.3	280	469	439	684	601	1000	8.88022	13.2599	12.4263	18.9355	18.3789	28.9445	0.0326134	0.727101	up	[Q]	Secondary metabolites biosynthesis, transport and catabolism	--	--	--	--	--	Glyoxalase/Bleomycin resistance protein/Dioxygenase superfamily	--	S	Function unknown	uncharacterized protein LOC101250492 [Solanum lycopersicum]
Solyc08g082180.3	1442	1721	1242	2127	2381	3109	36.5384	38.8463	28.0941	47.0376	58.1703	71.8583	0.0129629	0.653641	up	--	--	Biological Process: response to acid chemical (GO:0001101);; Molecular Function: molecular_function (GO:0003674);; Molecular Function: binding (GO:0005488);; Cellular Component: cellular_component (GO:0005575);; Cellular Component: intracellular (GO:0005622);; Cellular Component: cell (GO:0005623);; Cellular Component: nucleus (GO:0005634);; Cellular Component: cytoplasm (GO:0005737);; Cellular C…	K14496|6.4e-105|sly:101258886|K14496 abscisic acid receptor PYR/PYL family | (RefSeq) abscisic acid receptor PYL3	MAPK signaling pathway - plant (ko04016);; Plant hormone signal transduction (ko04075)	--	--	Polyketide cyclase / dehydrase and lipid transport	Abscisic acid receptor PYL3 OS=Oryza sativa subsp. japonica OX=39947 GN=PYL3 PE=1 SV=1	S	Function unknown	abscisic acid receptor PYL3 [Solanum lycopersicum]
Solyc05g015420.4	1368	1420	1705	2445	2108	2858	25.0445	23.1488	27.8673	39.0585	37.2026	47.7215	0.00811053	0.603062	up	--	--	Cellular Component: cellular_component (GO:0005575);; Cellular Component: intracellular (GO:0005622);; Cellular Component: cell (GO:0005623);; Cellular Component: nucleus (GO:0005634);; Cellular Component: organelle (GO:0043226);; Cellular Component: membrane-bounded organelle (GO:0043227);; Cellular Component: intracellular organelle (GO:0043229);; Cellular Component: intracellular membrane-boun…	K14972|4.4e-21|qsu:112038366|K14972 PAX-interacting protein 1 | (RefSeq) mediator of RNA polymerase II transcription subunit 15a-like isoform X1	--	--	--	--	F-box protein At1g67340 OS=Arabidopsis thaliana OX=3702 GN=At1g67340 PE=1 SV=1	S	Function unknown	F-box protein At1g67340 [Solanum lycopersicum]
Solyc01g096460.2	1144	1189	990	1728	1632	2043	25.3916	23.5187	19.6279	33.4836	34.9348	41.3871	0.00150973	0.601227	up	--	--	Molecular Function: protein binding (GO:0005515);;	--	--	[S]	Function unknown	Armadillo/beta-catenin-like repeat	Protein spotted leaf 11 OS=Oryza sativa subsp. indica OX=39946 GN=SPL11 PE=1 SV=2	S	Function unknown	U-box domain-containing protein 11 [Solanum lycopersicum]
Solyc03g112010.4	1150	1432	1018	1729	2212	2571	20.0316	22.2315	15.8318	26.2935	37.1658	40.862	0.0094909	0.705778	up	[QV]	Secondary metabolites biosynthesis, transport and catabolism;; Defense mechanisms	Molecular Function: iron ion binding (GO:0005506);; Molecular Function: oxidoreductase activity, acting on paired donors, with incorporation or reduction of molecular oxygen (GO:0016705);; Molecular Function: heme binding (GO:0020037);;	K20617|2.3e-226|nau:109209709|K20617 cytochrome P450 family 71 subfamily A | (RefSeq) cytochrome P450 71A3-like	--	[Q]	Secondary metabolites biosynthesis, transport and catabolism	Cytochrome P450	Cytochrome P450 71A2 OS=Solanum melongena OX=4111 GN=CYP71A2 PE=2 SV=1	Q	Secondary metabolites biosynthesis, transport and catabolism	cytochrome P450 71A3 [Solanum lycopersicum]
Solyc08g065940.4	1662	2273	1797	3105	3010	3365	89.9594	109.566	86.827	146.663	157.015	166.1	6.47026e-05	0.642042	up	--	--	Molecular Function: metal ion binding (GO:0046872);;	K23048|2.0e-23|gmx:100786368|K23048 RING finger protein unkempt | (RefSeq) zinc finger CCCH domain-containing protein	--	[R]	General function prediction only	--	Zinc finger CCCH domain-containing protein 20 OS=Arabidopsis thaliana OX=3702 GN=At2g19810 PE=2 SV=1	S	Function unknown	zinc finger CCCH domain-containing protein 20 [Solanum lycopersicum]
Solyc07g006890.1	17952	12725	12743	9828	5648	3283	341.975	215.924	216.75	163.385	103.695	57.0246	0.0456807	-0.848406	down	[QV]	Secondary metabolites biosynthesis, transport and catabolism;; Defense mechanisms	Molecular Function: iron ion binding (GO:0005506);; Molecular Function: oxidoreductase activity, acting on paired donors, with incorporation or reduction of molecular oxygen (GO:0016705);; Molecular Function: heme binding (GO:0020037);;	K20769|1.6e-288|sly:101246836|K20769 fatty acid omega-hydroxylase [EC:1.14.-.-] | (RefSeq) cytochrome P450 94A1-like	Cutin, suberine and wax biosynthesis (ko00073)	[QI]	Secondary metabolites biosynthesis, transport and catabolism;; Lipid transport and metabolism	Cytochrome P450	Cytochrome P450 94A1 OS=Vicia sativa OX=3908 GN=CYP94A1 PE=2 SV=2	--	--	cytochrome P450 94A1-like [Solanum lycopersicum]
Solyc06g082590.1	111	145	143	617	215	376	4.23589	4.96196	4.89411	20.7206	7.94839	13.1824	0.00611529	1.04046	up	--	--	Molecular Function: DNA binding (GO:0003677);; Molecular Function: transcription factor activity, sequence-specific DNA binding (GO:0003700);; Cellular Component: nucleus (GO:0005634);;	K13434|1.6e-132|sly:544043|K13434 pathogenesis-related genes transcriptional activator PTI6 | (RefSeq) SlCRF1; pathogenesis-related genes transcriptional activator PTI6	Plant-pathogen interaction (ko04626)	--	--	AP2 domain	Pathogenesis-related genes transcriptional activator PTI6 OS=Solanum lycopersicum OX=4081 GN=PTI6 PE=2 SV=1	K	Transcription	pathogenesis-related genes transcriptional activator PTI6 [Solanum lycopersicum]
Solyc04g009910.3	168	246	214	339	308	475	4.24204	5.51909	4.81354	7.47168	7.49778	10.9364	0.0347167	0.665036	up	[T]	Signal transduction mechanisms	Molecular Function: protein serine/threonine kinase activity (GO:0004674);; Molecular Function: ATP binding (GO:0005524);;	K08794|2.2e-114|nnu:104600864|K08794 calcium/calmodulin-dependent protein kinase I [EC:2.7.11.17] | (RefSeq) phosphoenolpyruvate carboxylase kinase 1-like	--	[T]	Signal transduction mechanisms	Protein kinase domain	Phosphoenolpyruvate carboxylase kinase 2 OS=Arabidopsis thaliana OX=3702 GN=PPCK2 PE=1 SV=2	T	Signal transduction mechanisms	phosphoenolpyruvate carboxylase kinase 2 [Solanum lycopersicum]
Solyc12g010540.1	206	763	592	180	169	92	4.54145	15.0249	11.6785	3.47232	3.59859	1.85167	0.0106705	-1.04595	down	[M]	Cell wall/membrane/envelope biogenesis	Cellular Component: integral component of membrane (GO:0016021);;	K08679|4.6e-252|sly:101251855|K08679 UDP-glucuronate 4-epimerase [EC:5.1.3.6] | (RefSeq) UDP-glucuronate 4-epimerase 1	Amino sugar and nucleotide sugar metabolism (ko00520)	[M]	Cell wall/membrane/envelope biogenesis	GDP-mannose 4,6 dehydratase	UDP-glucuronate 4-epimerase 1 OS=Arabidopsis thaliana OX=3702 GN=GAE1 PE=1 SV=1	M	Cell wall/membrane/envelope biogenesis	UDP-glucuronate 4-epimerase 1 [Solanum lycopersicum]
Solyc04g082450.3	922	1216	1079	1682	1563	1979	17.453	20.5005	18.2384	27.7891	28.5121	34.1795	0.000565011	0.608367	up	--	--	Biological Process: transcription, DNA-templated (GO:0006351);; Cellular Component: DRM complex (GO:0070176);;	--	--	--	--	Retinal tissue protein	--	--	--	uncharacterized protein LOC101259630 [Solanum lycopersicum]
Solyc12g009300.3	681	838	2030	3146	3516	4565	6.222	6.8191	16.5616	25.0806	30.9586	38.036	0.00916806	1.03107	up	[M]	Cell wall/membrane/envelope biogenesis	Biological Process: sucrose metabolic process (GO:0005985);; Molecular Function: sucrose synthase activity (GO:0016157);;	K00695|0.0e+00|sly:543961|K00695 sucrose synthase [EC:2.4.1.13] | (RefSeq) sucrose synthase	Starch and sucrose metabolism (ko00500)	[M]	Cell wall/membrane/envelope biogenesis	Sucrose synthase	Sucrose synthase OS=Solanum lycopersicum OX=4081 PE=2 SV=1	M	Cell wall/membrane/envelope biogenesis	sucrose synthase [Solanum lycopersicum]
Solyc09g007800.3	278	282	261	523	412	550	10.9986	9.94595	9.22309	18.0981	15.7666	19.9114	0.000523678	0.726452	up	--	--	Cellular Component: integral component of membrane (GO:0016021);;	--	--	--	--	--	--	L	Replication, recombination and repair	uncharacterized protein LOC101246657 [Solanum lycopersicum]
Solyc02g090120.1	7754	6029	10404	15568	16592	20613	853.91	591.488	1023.06	1496.37	1761.4	2070.56	0.00463088	0.870422	up	--	--	--	--	--	--	--	--	--	--	--	hypothetical protein EJD97_012012 [Solanum chilense]
Solyc05g008120.4	18	22	15	173	39	99	0.627643	0.689266	0.468632	5.44894	1.33632	3.26057	0.00609547	1.11809	up	--	--	--	--	--	--	--	--	--	O	Posttranslational modification, protein turnover, chaperones	uncharacterized protein LOC101253780 [Solanum lycopersicum]
Solyc12g096290.3	815	521	650	446	337	362	10.1856	5.80246	7.25565	4.85856	4.05768	4.12443	0.0384025	-0.709909	down	--	--	Cellular Component: exocyst (GO:0000145);; Biological Process: vesicle docking involved in exocytosis (GO:0006904);;	K19985|0.0e+00|sly:101259136|K19985 exocyst complex component 6 | (RefSeq) exocyst complex component SEC15A	--	[U]	Intracellular trafficking, secretion, and vesicular transport	Exocyst complex subunit Sec15-like	Exocyst complex component SEC15A OS=Arabidopsis thaliana OX=3702 GN=SEC15A PE=3 SV=2	U	Intracellular trafficking, secretion, and vesicular transport	exocyst complex component SEC15A [Solanum lycopersicum]
Solyc07g007410.4	4893	4949	4698	8689	8924	10887	135.478	122.079	116.15	210.007	238.206	274.964	1.02222e-08	0.860522	up	--	--	Molecular Function: protein binding (GO:0005515);;	--	--	--	--	Leucine Rich repeat	--	S	Function unknown	LRR receptor-like serine/threonine-protein kinase ERL2 [Solanum pennellii]
Solyc12g036120.1	80	72	77	37	29	39	2.00596	1.6133	1.72096	0.797635	0.68936	0.895678	0.0153108	-0.887907	down	--	--	Cellular Component: integral component of membrane (GO:0016021);;	K05665|2.9e-125|pxb:103936281|K05665 ATP-binding cassette, subfamily C (CFTR/MRP), member 1 [EC:7.6.2.3] | (RefSeq) ABC transporter C family member 12-like	ABC transporters (ko02010)	[Q]	Secondary metabolites biosynthesis, transport and catabolism	--	ABC transporter C family member 12 OS=Arabidopsis thaliana OX=3702 GN=ABCC12 PE=2 SV=1	Q	Secondary metabolites biosynthesis, transport and catabolism	hypothetical protein EJD97_004477 [Solanum chilense]
Solyc09g008080.3	200	241	277	390	441	557	7.62807	8.19445	9.45577	13.0065	16.2376	19.4179	0.00647891	0.769851	up	--	--	--	--	--	--	--	--	--	--	--	uncharacterized protein LOC101265954 [Solanum lycopersicum]
Solyc06g059720.3	550	474	1155	252	197	134	12.27	9.40499	23.0024	4.90223	4.23508	2.71249	0.0007429	-1.23936	down	[F]	Nucleotide transport and metabolism	Biological Process: fatty acid metabolic process (GO:0006631);; Molecular Function: acyl-[acyl-carrier-protein] desaturase activity (GO:0045300);; Molecular Function: metal ion binding (GO:0046872);;	K03921|4.1e-215|sly:101245370|K03921 acyl-[acyl-carrier-protein] desaturase [EC:1.14.19.2 1.14.19.11 1.14.19.26] | (RefSeq) stearoyl-[acyl-carrier-protein] 9-desaturase 6, chloroplastic	Fatty acid biosynthesis (ko00061);; Biosynthesis of unsaturated fatty acids (ko01040);; Fatty acid metabolism (ko01212)	--	--	Fatty acid desaturase	Stearoyl-[acyl-carrier-protein] 9-desaturase 6, chloroplastic OS=Arabidopsis thaliana OX=3702 GN=S-ACP-DES6 PE=2 SV=2	C	Energy production and conversion	stearoyl-[acyl-carrier-protein] 9-desaturase 6, chloroplastic [Solanum lycopersicum]
Solyc11g069270.2	126	135	121	80	52	58	1.2096	1.15458	1.04147	0.673726	0.474792	0.503099	0.0092783	-0.855484	down	[G]	Carbohydrate transport and metabolism	Molecular Function: beta-galactosidase activity (GO:0004565);; Cellular Component: cell wall (GO:0005618);; Cellular Component: vacuole (GO:0005773);; Biological Process: carbohydrate metabolic process (GO:0005975);; Cellular Component: integral component of membrane (GO:0016021);; Molecular Function: carbohydrate binding (GO:0030246);;	K12309|9.8e-238|eus:EUTSA_v10010152mg|K12309 beta-galactosidase [EC:3.2.1.23] | (RefSeq) hypothetical protein	Galactose metabolism (ko00052);; Other glycan degradation (ko00511);; Glycosaminoglycan degradation (ko00531);; Sphingolipid metabolism (ko00600);; Glycosphingolipid biosynthesis - ganglio series (ko00604)	[G]	Carbohydrate transport and metabolism	Glycosyl hydrolases family 35	Beta-galactosidase 8 OS=Arabidopsis thaliana OX=3702 GN=BGAL8 PE=2 SV=2	G	Carbohydrate transport and metabolism	beta-galactosidase 5 [Solanum lycopersicum]
Solyc06g051800.3	1541	1911	1568	3240	2780	4148	29.8625	32.9864	27.1342	54.804	51.9324	73.3253	4.8454e-06	0.880694	up	--	--	Cellular Component: extracellular region (GO:0005576);; Cellular Component: cell wall (GO:0005618);; Biological Process: plant-type cell wall organization (GO:0009664);; Cellular Component: membrane (GO:0016020);;	K20628|7.0e-102|sind:105166984|K20628 expansin | (RefSeq) expansin-A2	--	--	--	Expansin C-terminal domain	Expansin-A7 OS=Oryza sativa subsp. japonica OX=39947 GN=EXPA7 PE=2 SV=1	S	Function unknown	expansin precursor [Solanum lycopersicum]
